# RNA polymerase sliding on DNA can couple the transcription of nearby bacterial operons.

Debora Tenenbaum,<sup>1,2,3</sup> Koe Inlow,<sup>1</sup> Larry Friedman,<sup>1</sup> Anthony Cai,<sup>1</sup> Jeff Gelles,<sup>1,\*</sup> Jane Kondev<sup>2,\*</sup>

<sup>1</sup>Department of Biochemistry, Brandeis University, Waltham, MA, United States

<sup>2</sup>Department of Physics, Brandeis University, Waltham, MA, United States

<sup>3</sup>Simons Center for Quantitative Biology, Cold Spring Harbor Laboratory, Cold Spring Harbor, NY, USA

\*Correspondence: [gelles@brandeis.com](mailto:gelles@brandeis.com), [kondev@brandeis.com](mailto:kondev@brandeis.com)

## SIGNIFICANCE STATEMENT

1 After transcribing an operon, a bacterial RNA polymerase can stay bound to DNA, slide along it, and reini-  
2 tiate transcription of the same or a different operon. Quantitative single-molecule biophysics experiments  
3 combined with mathematical theory demonstrate that this reinitiation process can be quick and efficient  
4 over gene spacings typical of a bacterial genome. Reinitiation may provide a mechanism to orchestrate  
5 the transcriptional activities of groups of nearby operons.

## 6 ABSTRACT

7 DNA transcription initiates after an RNA polymerase (RNAP) molecule binds to the promoter of a gene.  
8 In bacteria, the canonical picture is that RNAP comes from the cytoplasmic pool of freely diffusing RNAP  
9 molecules. Recent experiments suggest the possible existence of a separate pool of polymerases, com-  
10 petent for initiation, which freely slide on the DNA after having terminated one round of transcription.  
11 Promoter-dependent transcription reinitiation from this pool of post-termination RNAP may lead to cou-  
12 pled initiation at nearby operons, but it is unclear whether this can occur over the distance- and time-scales  
13 needed for it to function widely on a bacterial genome in vivo. Here, we mathematically model the hypoth-  
14 esized reinitiation mechanism as a diffusion-to-capture process and compute the distances over which  
15 significant inter-operon coupling can occur and the time required. These quantities depend on previously  
16 uncharacterized molecular association and dissociation rate constants between DNA, RNAP and the tran-  
17 scription initiation factor  $\sigma^{70}$ ; we measure these rate constants using single-molecule experiments in vitro.  
18 Our combined theory/experimental results demonstrate that efficient coupling can occur at physiologically  
19 relevant  $\sigma^{70}$  concentrations and on timescales appropriate for transcript synthesis. Coupling is efficient over  
20 terminator-promoter distances up to  $\sim 1,000$  bp, which includes the majority of terminator-promoter near-  
21 est neighbor pairs in the *E. coli* genome. The results suggest a generalized mechanism that couples the  
22 transcription of nearby operons and breaks the paradigm that each binding of RNAP to DNA can produce  
23 at most one messenger RNA.

24 **Keywords** Reaction-diffusion model | Single-molecule fluorescence | Gene coupling

## 25 INTRODUCTION

26 The core RNA polymerase (RNAP) in bacteria, which is composed of five subunits ( $\beta$ ,  $\beta'$ ,  $\alpha^I$ ,  $\alpha^{II}$ , and  $\omega$ ), can  
27 catalyze the synthesis of RNA, but cannot recognize specific promoter sequences. To recognize promoters,  
28 RNAP must first bind an initiation factor such as the *E. coli* housekeeping  $\sigma^{70}$ , forming an RNAP holoen-  
29 zyme ( $\sigma^{70}$ RNAP)<sup>1-3</sup>. DNA transcription initiates when  $\sigma^{70}$ RNAP is recruited from cytoplasm to bind to the  
30 promoter region of a gene. Controlling this process is thought to be the principal means through which  
31 transcription repressors and activators modulate gene transcription.

32 Bacterial metabolism requires the coordinated expression of multiple genes<sup>4</sup>. A basic way in which this  
33 coordination is achieved in bacterial cells is by the organization of functionally related genes into operons,  
34 which are groups of consecutive genes that can be transcribed from the same promoter<sup>5,6</sup>. Functionally  
35 related operons often reside in contiguous regions of the bacterial genome<sup>7</sup>. Proximally located operons  
36 show higher levels of correlated expression than distant operons in *E. coli*<sup>8-10</sup>. The same is true of closely  
37 spaced genes in eukaryotes<sup>11,12</sup>.

38 While specific groups of bacterial operons may have correlated activities simply because they have com-  
39 mon regulatory proteins (e.g., alternative sigma factors), there are also proximity-based mechanisms that  
40 can couple transcription of adjacent operons. Terminator readthrough, in which the RNAP fails to read  
41 a terminator signal and keeps elongating the mRNA molecule, can generate the joint transcription of co-  
42 directional neighboring operons. Transcription-coupled DNA supercoiling<sup>13</sup> can induce coupled transcrip-  
43 tion of divergently transcribed genes<sup>14,15</sup>.

44 Recently, a new mechanism of proximity-based transcription coupling was observed. Using single-  
45 molecule microscopy, Harden et al.<sup>16</sup> and Kang et al.<sup>17,18</sup> observed that RNAP can remain bound to DNA  
46 after termination for at least hundreds of seconds in vitro. This post-termination RNAP-DNA complex may  
47 retain a partially open bubble in the DNA<sup>19</sup>. The retained RNAP exhibits one-dimensional diffusive slid-  
48 ing over hundreds or thousands of base pairs along the DNA. In the presence of  $\sigma^{70}$  in solution, the sliding  
49 RNAP can re-initiate transcription at a nearby promoter. This post-termination behavior of bacterial RNAP  
50 may couple transcription of nearby operons in a way that is dependent on both the distance between the  
51 two transcription units and the available concentration of  $\sigma^{70}$ . Genome-wide transcription measurements  
52 are consistent with this mechanism, but do not prove that it operates in vivo in both *E. coli* and *B. subtilis*<sup>16</sup>.

53 In this work, we test whether RNAP post-termination sliding followed by  $\sigma^{70}$  rebinding can efficiently  
54 couple the transcription of nearby operons. First, we mathematically model the mechanism as a diffusion-  
55 to-capture process, in which the association of a  $\sigma^{70}$  molecule with the sliding RNAP is required for re-  
56 initiation at a nearby promoter sequence. Next, we use single-molecule microscopy experiments under  
57 conditions designed to mimic the ionic composition of bacterial cytoplasm to measure the values of the  
58 model kinetic parameters. Finally, we input the measured values into the model to predict the distances

59 and times over which post-termination sliding of RNAP could couple expression of neighboring genes.

## 60 RESULTS

### 61 Model of operon coupling by sliding RNAP

62 We model transcriptional coupling between proximal operons using the sliding RNAP mechanism de-  
 63 picted in Fig. 1. The distance between the terminator of the first operon and the promoter of the second  
 64 operon is  $d$ . Upon reaching the terminator sequence T of the primary operon (at time  $t = 0$ ), the RNAP  
 65 releases an RNA transcript but remains non-specifically bound, enabling it to diffuse along the DNA with  
 66 a diffusion coefficient  $D$ . During this time interval of sliding, the RNAP can either dissociate from the DNA  
 67 with rate  $k_{\text{off}}$ , or bind a  $\sigma^{70}$  molecule from solution with a rate  $k_b[\sigma^{70}]$ , where  $[\sigma^{70}]$  denotes the free  $\sigma^{70}$  solu-  
 68 tion concentration. In the latter case, the RNAP- $\sigma^{70}$  complex continues diffusing along the DNA molecule,  
 69 and can dissociate with a rate  $k_{\text{off},s}$ , or can encounter and be captured by the promoter for the secondary  
 70 operon. We define the time it takes the captured RNAP- $\sigma^{70}$  complexes to find the secondary promoter  
 71 as the search time  $t_f$ . In this mechanism,  $\sigma^{70}$  can have conflicting effects because it can stimulate RNAP  
 72 dissociation from DNA via the  $k_{\text{off},s}$  step and yet is also required for secondary promoter capture.

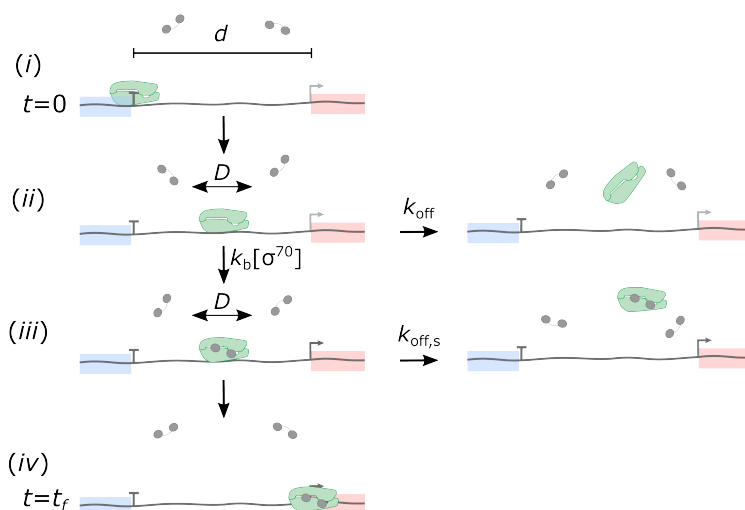

**Figure 1: Model of operon coupling by sliding RNAP.** (i) An RNAP molecule (green) terminates transcription of the primary operon (blue), and (ii) starts sliding along the DNA molecule with a diffusion constant  $D$ . (iii) While sliding, the RNAP can either dissociate from the DNA with rate  $k_{\text{off}}$ , or bind  $\sigma^{70}$  (gray) with rate  $k_b[\sigma^{70}]$ . (iv) After binding of  $\sigma^{70}$ , the RNAP- $\sigma^{70}$  complex can either dissociate with a rate  $k_{\text{off},s}$ , or find the promoter (bent arrow) for the secondary operon (pink), which is located is at a distance  $d$  along the DNA from the primary operon terminator (T).

73 For simplicity, we assume that the binding of  $\sigma^{70}$  to sliding RNAP is irreversible. This is equivalent to  
 74 assuming that the unbinding of  $\sigma^{70}$  from the sliding RNAP is significantly slower than the dissociation of  
 75 the RNAP- $\sigma^{70}$  complex from the DNA. This assumption is reasonable, given previous measurements of  
 76  $\sigma^{70}$  dissociation from free<sup>20,21</sup> and DNA-bound RNAP<sup>17</sup>. Also for simplicity, we assume that the diffusion

77 coefficient on DNA of the RNAP- $\sigma^{70}$  complex and RNAP are the same.

78 In this work we will refer to the complex that is formed by binding of  $\sigma^{70}$  to DNA-bound RNAP as RNAP-  
79  $\sigma^{70}$ -DNA and to the complex formed by binding  $\sigma^{70}$  RNAP holoenzyme to DNA as holoenzyme-DNA. It is not  
80 currently known whether these different orders of assembly produce complexes with the same structure  
81 (see Discussion).

## 82 Calculation of coupling efficiency

83 To quantify how transcriptional coupling by sliding RNAP changes with varying distance between operons  
84 and with  $[\sigma^{70}]$ , we define the coupling efficiency ( $E$ ) as the probability that an RNAP molecule, which termi-  
85 nates transcription of the primary operon, reaches the promoter of the secondary promoter by the sliding  
86 RNAP mechanism. To reach the secondary promoter, (i) the sliding RNAP has to bind a  $\sigma^{70}$  molecule from  
87 solution before falling off the DNA, and (ii) the RNAP- $\sigma^{70}$  complex then has to reach the secondary promoter  
88 before falling off the DNA. The probability of (i),  $P_{\text{bind}}$ , is given by the partition ratio

$$89 \quad P_{\text{bind}} = \frac{k_{\text{b}} [\sigma^{70}]}{k_{\text{b}} [\sigma^{70}] + k_{\text{off}}}, \quad (1)$$

90 while the probability of (ii),  $P_{\text{find}}$ , can be computed as the probability that a RNAP- $\sigma^{70}$  complex remains  
91 bound to DNA for at least the time needed to find the secondary promoter before dissociating.

92 To determine  $P_{\text{find}}$ , we combine the distribution of times it takes RNAP- $\sigma^{70}$  complexes to encounter the  
93 secondary promoter for the first time,  $p_{\text{first passage}}(t)$ , and the probability that the complex will stay bound on  
94 the DNA long enough for the encounter to happen. Thus,  $P_{\text{find}}$  is given by

$$95 \quad P_{\text{find}} = \int_0^{\infty} p_{\text{first passage}}(t') \exp(-k_{\text{off},s} t') dt'. \quad (2)$$

96 Here we use uppercase  $P$  to refer to probabilities, and lowercase  $p$  to represent probability density functions  
97 (PDFs).

98 RNAP terminates transcription of the primary operon at  $x = 0$  and starts performing a one-dimensional  
99 random walk along the DNA with diffusion coefficient  $D$ . How long it takes for a RNAP- $\sigma^{70}$  complex to first  
100 encounter the secondary promoter will depend on its position on the DNA ( $x_{\text{b}}$ ) when it starts the search,  
101 i.e., when  $\sigma^{70}$  binds the sliding RNAP molecule.  $x_{\text{b}}$  in turn depends on how long after termination at the  
102 primary terminator  $\sigma^{70}$  binds ( $t_{\text{b}}$ ). At a time  $t_{\text{b}}$  drawn at random from the exponential distribution

$$103 \quad p_{\text{bind},t}(t_{\text{b}}) = (k_{\text{b}}[\sigma^{70}] + k_{\text{off}}) \exp(-(k_{\text{b}}[\sigma^{70}] + k_{\text{off}})t_{\text{b}}), \quad (3)$$

104 the sliding RNAP will either bind a  $\sigma^{70}$  molecule or dissociate from the DNA. If it binds a  $\sigma^{70}$  molecule, the

105 binding position will be a random value drawn from

$$106 \quad p_{\text{bind},x}^{\text{cond}}(x_b|t_b) = \mathcal{N}(0, 2Dt_b), \quad (4)$$

107 where  $\mathcal{N}(\mu, \text{var})$  describes a normal distribution with mean  $\mu$  and variance  $\text{var}$ . Eq. 4 represents the con-  
108 ditional probability distribution for  $x_b$  given the binding time  $t_b$ . Now we can calculate the unconditional  
109 distribution of binding positions

$$110 \quad p_{\text{bind},x}(x_b) = \int_0^\infty p_{\text{bind},x}^{\text{cond}}(x_b|t') p_{\text{bind},t}(t') dt' \quad (5)$$

$$= \sqrt{\frac{k_b[\sigma] + k_{\text{off}}}{4D}} \exp\left(-\sqrt{\frac{k_b[\sigma] + k_{\text{off}}}{D}} |x_b|\right).$$

111 The distribution of times  $t_{\text{fp}}$  it would take the RNAP- $\sigma^{70}$  complex to reach the secondary promoter at  
112  $x = d$  for the first time is then given by the first-passage-time density for a one-dimensional random walk<sup>22</sup>

$$113 \quad p_{\text{first passage}}^{\text{cond}}(t_{\text{fp}}|x_b) = \frac{|d - x_b|}{\sqrt{4\pi D t_{\text{fp}}^3}} \exp\left(-\frac{(d - x_b)^2}{4D t_{\text{fp}}}\right), \quad (6)$$

114 which is conditional on  $x_b$ . The unconditional distribution of first passage times is then calculated as

$$115 \quad p_{\text{first passage}}(t_{\text{fp}}) = \int_{-\infty}^{+\infty} p_{\text{first passage}}^{\text{cond}}(t_{\text{fp}}|x') p_{\text{bind},x}(x') dx'. \quad (7)$$

116 Finally, substituting Eq. 7 into Eq. 2 to get  $P_{\text{find}}$ , and multiplying by  $P_{\text{bind}}$  (Eq. 1), we get the expressions in  
117 Eq. 8.

$$118 \quad E(d, [\sigma^{70}]) = \begin{cases} \frac{k_b[\sigma^{70}]}{k_b[\sigma^{70}] + k_{\text{off}} - k_{\text{off},s}} \left( \exp\left(-\sqrt{\frac{k_{\text{off},s}}{D}} d\right) - \sqrt{\frac{k_{\text{off},s}}{k_b[\sigma^{70}] + k_{\text{off}}}} \exp\left(-\sqrt{\frac{k_b[\sigma^{70}] + k_{\text{off}}}{D}} d\right) \right), & \text{if } k_b[\sigma^{70}] + k_{\text{off}} \neq k_{\text{off},s} \\ \frac{k_b[\sigma^{70}]}{2} \exp\left(-\sqrt{\frac{k_{\text{off},s}}{D}} d\right) \left( \frac{d}{\sqrt{k_{\text{off},s} D}} + \frac{1}{k_{\text{off},s}} \right), & \text{if } k_b[\sigma^{70}] + k_{\text{off}} = k_{\text{off},s} \end{cases} \quad (8)$$

### 119 Coupling regimes and calculation of coupling distance

120 We can distinguish three different coupling regimes depending on the availability of free  $\sigma^{70}$  molecules. For  
121 this, we define a critical  $\sigma^{70}$  concentration at which the diffusion time intervals available before and after  
122  $\sigma^{70}$  binding to RNAP are equal,  $[\sigma^{70}]_c = \frac{k_{\text{off},s} - k_{\text{off}}}{k_b} \approx \frac{k_{\text{off},s}}{k_b}$ . Here we used  $k_{\text{off}} \ll k_{\text{off},s}$  based on prior studies<sup>23</sup>  
123 and our experimental results (see below).

124 1. When  $[\sigma^{70}] \gg [\sigma^{70}]_c$ , the coupling efficiency at small  $d$  is given by  $P_{\text{bind}}$  (Eq. 1) since any RNAP that

125 binds  $\sigma^{70}$  will subsequently encounter the promoter. For larger  $d$  the efficiency decays exponentially,

126 
$$E \approx P_{\text{bind}} \exp\left(-\sqrt{\frac{k_{\text{off},s}}{D}}d\right). \quad (9)$$

127 In this regime, we can define the *coupling distance* as the characteristic decay distance of the cou-  
 128 pling,  $d_c^{\gg} \approx \sqrt{\frac{D}{k_{\text{off},s}}}$ .

129 2. When  $[\sigma^{70}] \ll [\sigma^{70}]_c$ , the decay is also exponential but in this case,

130 
$$E \approx P_{\text{bind}} \sqrt{\frac{k_b[\sigma^{70}] + k_{\text{off}}}{k_{\text{off},s}}} \exp\left(-\sqrt{\frac{k_b[\sigma^{70}] + k_{\text{off}}}{D}}d\right), \quad (10)$$

131 and the characteristic distance is  $d_c^{\ll} \approx \sqrt{\frac{D}{k_b[\sigma^{70}] + k_{\text{off}}}}$ . However, in this case  $\sqrt{\frac{k_b[\sigma^{70}] + k_{\text{off}}}{k_{\text{off},s}}} \ll 1$ , which means  
 132 that there is no significant coupling between adjacent transcription units no matter the distance be-  
 133 tween them.

134 3. For  $[\sigma^{70}] \approx [\sigma^{70}]_c$ , we get the bottom expression in Eq. 8. Even though it is not exponential, we can still  
 135 define a coupling distance  $d_c^{\approx}$  over which the coupling efficiency decays by a factor of  $e$ . Following the  
 136 calculations in Appendix S1, we get

137 
$$\begin{aligned} d_c^{\approx} &\approx 2.15 \sqrt{\frac{D}{k_{\text{off},s}}} = 2.15 \sqrt{\frac{D}{k_b[\sigma^{70}] + k_{\text{off}}}} \\ &= 1.08 \left( \sqrt{\frac{D}{k_{\text{off},s}}} + \sqrt{\frac{D}{k_b[\sigma^{70}] + k_{\text{off}}}} \right). \end{aligned} \quad (11)$$

138 In simple terms, the regimes differ by whether most of the diffusional search for the secondary promoter  
 139 takes place after (regime 1) or before (regime 2) the binding of  $\sigma^{70}$ . In addition, given that  $\sqrt{\frac{D}{k_b[\sigma^{70}] + k_{\text{off}}}} \ll$   
 140  $\sqrt{\frac{D}{k_{\text{off},s}}}$  in regime 1, and  $\sqrt{\frac{D}{k_{\text{off},s}}} \ll \sqrt{\frac{D}{k_b[\sigma^{70}] + k_{\text{off}}}}$  in regime 2, for all three regimes we can then approximate  
 141 the coupling distance as  $d_c \approx \sqrt{\frac{D}{k_b[\sigma] + k_{\text{off}}}} + \sqrt{\frac{D}{k_{\text{off},s}}}$ , which is roughly the sum of the root mean squared dis-  
 142 placements of the RNAP before and after binding a  $\sigma^{70}$  molecule (Fig. S1). Efficiency curves as a function  
 143 of distance scaled by the critical distance are shown for all three regimes in Fig. 2. As expected, when the  
 144 concentration of  $\sigma^{70}$  is well below its critical concentration, the efficiency is small for any distance between  
 145 the two promoters, while the efficiency can be of order one when  $[\sigma^{70}]$  is well above  $[\sigma^{70}]_c$ .

#### 146 **Single-molecule microscopy experiments to measure model parameters**

147 To estimate the coupling efficiency  $E$ , coupling distance  $d_c$ , and search times  $t_f$  that can be achieved via the  
 148 proposed mechanism (Fig. 1), we need values for the model parameters  $D$ ,  $k_b$ ,  $k_{\text{off}}$ , and  $k_{\text{off},s}$ .

149 The diffusion coefficient of RNAP post termination,  $D = (3.9 \pm 0.5) \times 10^4 \text{ bp}^2\text{s}^{-1}$ , was experimentally  
 150 measured in ref. <sup>16</sup>. Those investigators also sometimes observed a non-diffusing post termination RNAP-

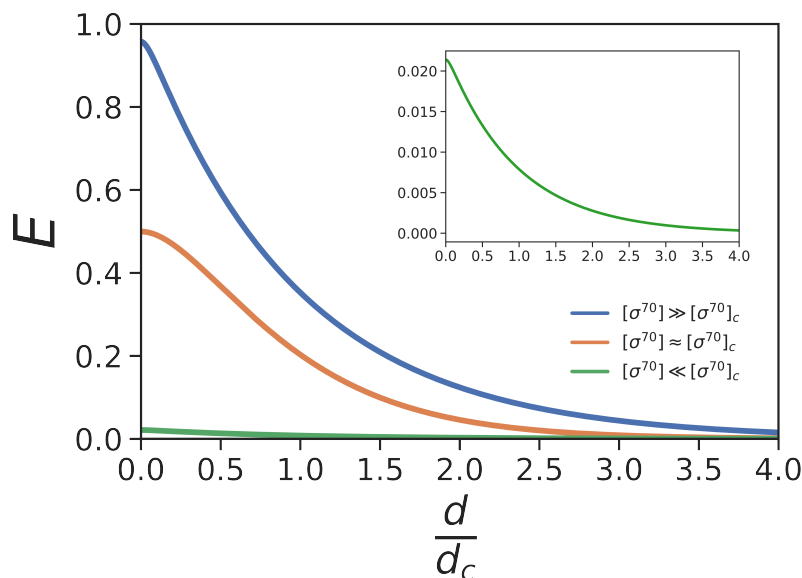

**Figure 2: Predicted relationship of Coupling efficiency  $E$  to the distance between operons.** The coupling efficiency is the probability of an RNAP that terminated transcription at the end of the primary operon reaching the secondary promoter. Efficiency curves are shown for the three regimes of  $\sigma^{70}$  concentration described in the text, for a chosen set of parameter values:  $k_b = 10^7 \text{ M}^{-1}\text{s}^{-1}$ ,  $k_{\text{off}} = 10^{-3} \text{ s}^{-1}$ ,  $k_{\text{off},s} = 1 \text{ s}^{-1}$ ,  $D = 4 \times 10^4 \text{ bp}^2\text{s}^{-1}$ . Curves were calculated using Eq. 8. Distance is represented in units of the coupling distance  $d_c \approx \sqrt{D(k_b[\sigma^{70}] + k_{\text{off}})^{-1} + \sqrt{D(k_{\text{off},s})^{-1}}$ . Inset: enlarged plot of the curve for  $[\sigma^{70}] \ll [\sigma^{70}]_c$ .

151 DNA complex in their experiments, but attributed this to RNAP binding to the ends of the linear DNA  
 152 molecules they used.

153 We performed single-molecule experiments to measure  $k_b$ ,  $k_{\text{off}}$  and  $k_{\text{off},s}$ . Specifically, we quantified the  
 154 dwell times of RNAP on promoterless DNA templates in the presence of different concentrations of  $\sigma^{70}$   
 155 (Fig. 3A). These experiments allow us to measure all three rate constants. This is because at low  $\sigma^{70}$  concen-  
 156 trations the measured dwell times are limited by the rate of RNAP dissociation from DNA, at intermediate  
 157  $\sigma^{70}$  concentrations they are limited by the rate of  $\sigma^{70}$  binding to the RNAP-DNA complex, and at high  $\sigma^{70}$   
 158 concentrations they are limited by the rate of RNAP- $\sigma^{70}$  complex dissociation from DNA.

159 For experimental convenience, we did not use core RNAP-DNA complexes that were formed after ter-  
 160 mination of transcription. Instead, we directly formed sequence non-specific RNAP-DNA complexes by  
 161 adding core RNAP to a DNA that lacks known promoter sequences. The two types of complexes have the  
 162 same protein composition and have similar properties: both are long-lived, in both RNAP slides on DNA,  
 163 both are sensitive to the polyanion heparin<sup>16</sup>, and both are rapidly disassembled by the bacterial SNF2  
 164 ATPase RapA<sup>24</sup>.

165 To implement these experiments we designed and synthesized a biotinylated, 3,033 bp circular DNA  
 166 lacking known promoter sequences that was labeled with the red-excited dye Cy5 (we refer to this con-  
 167 struct as DNA<sub>Long</sub><sup>Cy5</sup>). Circular DNAs were used to avoid possible binding of RNAP to DNA ends<sup>25</sup>, which are  
 168 largely non-physiological since the *E. coli* chromosome is circular.

169 We immobilized DNA<sub>Long</sub><sup>Cy5</sup> molecules on the surface of a glass flow chamber via a biotin-streptavidin link-

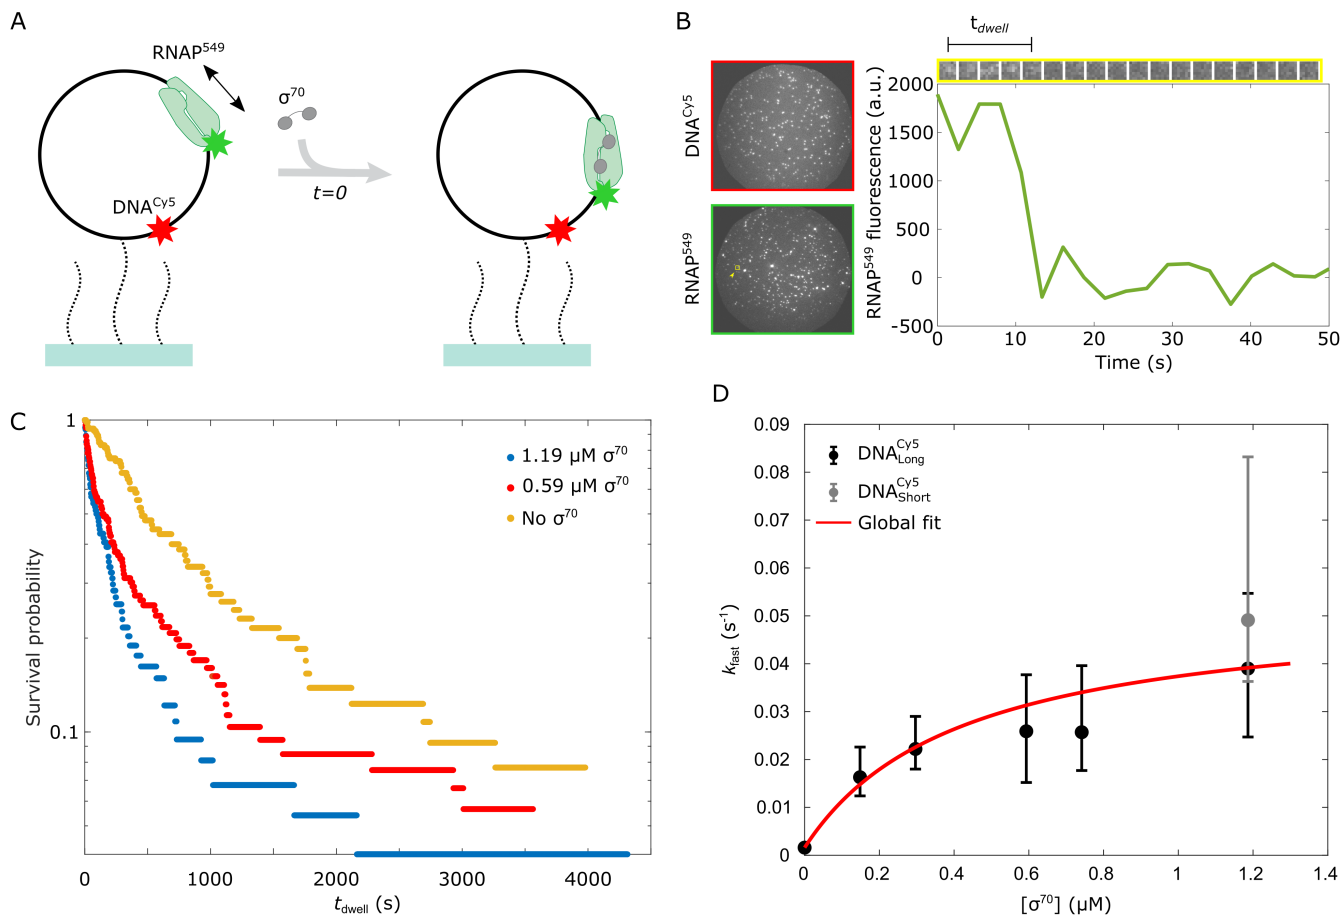

**Figure 3: Single-molecule experiments to measure  $k_b$ ,  $k_{off}$ , and  $k_{off,s}$ .** **a.** Experiment schematic. Fluorescently labeled, promoterless circular DNA templates (DNA<sup>Cy5</sup><sub>Long</sub>; black circles) were tethered to the surface of a glass flow chamber (blue) through polyethylene glycol linkers (dotted black curves). The chamber was then incubated with fluorescently labeled core RNAP (RNAP<sup>549</sup>) to form RNAP-DNA nonspecific complexes, which correspond to the post-termination complex. In each of six experiments, a different concentration of  $\sigma^{70}$  (gray) was introduced at  $t = 0$ , and the lifetime of each RNAP<sup>549</sup> that colocalized with a surface-tethered DNA molecule was monitored by single-molecule fluorescence microscopy. **b.** Example of experiment record. Left: DNA<sup>Cy5</sup><sub>Long</sub> and RNAP<sup>549</sup> fluorescence images of the same field of view ( $65 \mu\text{m}$  diameter) upon introducing  $1.19 \mu\text{M}$   $\sigma^{70}$  at  $t = 0$ . Right: Time record excerpt of RNAP<sup>549</sup> fluorescence at the location of a single DNA molecule. Gallery shows  $5 \times 5$  pixel images centered on the DNA molecule; graph shows the summed, background-corrected intensity of the  $3 \times 3$  pixels centered on the DNA.  $t_{dwell}$  represents the duration of the fluorescent spot. **c.**  $t_{dwell}$  survival probability distributions in the presence of 0, 0.59, and  $1.19 \mu\text{M}$   $\sigma^{70}$ . **d.** Rates (with 68% C.I.s) of  $\sigma^{70}$ -dependent dissociation of RNAP<sup>549</sup> from DNA<sup>Cy5</sup><sub>Long</sub> (black) and DNA<sup>Cy5</sup><sub>Short</sub> (gray) as a function of  $\sigma^{70}$  concentration, and global fit (red; see eq. (12) and accompanying text).



170 age (Fig. 3A). We then incubated the chamber with a solution containing *E. coli* core RNAP labeled with a  
171 green-excited dye (RNAP<sup>549</sup>) for ~ 10 min, and washed it out at time  $t = 0$  with a solution containing  $\sigma^{70}$  in  
172 the 0 to 1.2  $\mu\text{M}$  range. Single-molecule total internal reflection microscopy was performed with alternating  
173 red and green excitation for observation of DNA<sub>Long</sub><sup>Cy5</sup> and RNAP<sup>549</sup>, respectively. An example of the fluores-  
174 cence records used for extracting the dwell times of the RNAP<sup>549</sup> molecules on the DNA<sub>Long</sub><sup>Cy5</sup> template for  
175 each experiment is shown in Fig. 3B.

176 Given that these experiments study sequence-nonspecific interactions between RNAP<sup>549</sup> and DNA<sub>Long</sub><sup>Cy5</sup>,  
177 it was expected that multiple RNAP<sup>549</sup> molecules could be bound to the same DNA<sub>Long</sub><sup>Cy5</sup> template simulta-  
178 neously. To reduce complications in the dwell time measurements arising from multiple RNAP<sup>549</sup> molecules  
179 bound to the same template, we restricted the analysis to only those DNA<sub>Long</sub><sup>Cy5</sup> locations with a single colo-  
180 calized RNAP<sup>549</sup>. The number of RNAP<sup>549</sup> molecules bound to each DNA<sub>Long</sub><sup>Cy5</sup> template was quantified by  
181 counting the number of decreasing steps present in the RNAP<sup>549</sup> fluorescence intensity records (Fig. S2  
182 and Appendix S3).

### 183 Distributions of RNAP dwell times on DNA

184 Example dwell time probability distributions of RNAP<sup>549</sup> on promoterless circular DNA templates for differ-  
185 ent concentrations of  $\sigma^{70}$  are shown in Fig. 3C. Consistent with the results in<sup>23</sup>,  $\sigma^{70}$  accelerates the dissoci-  
186 ation of RNAP from DNA.

187 In the absence of promoter sequences in the DNA, the model in Fig. 1 predicts that the dwell time  
188 distributions for RNAP obtained in the limits of low and high  $[\sigma^{70}]$  are exponential. Theoretically, at inter-  
189 mediate  $[\sigma^{70}]$  the dwell time distributions are non-exponential, due to the presence of two sequential steps  
190 ( $k_b$  and  $k_{\text{off},s}$ ). Still, for reasonable values of the rate constants the distribution is well approximated by an  
191 exponential and the effective rate constant has a hyperbolic dependence on  $[\sigma^{70}]$ ,

$$192 \quad k_{\text{eff}} \approx k_{\text{off}} + \frac{k_{\text{off},s} k_b [\sigma^{70}]}{k_b [\sigma^{70}] + k_{\text{off},s}}. \quad (12)$$

193 However, the experimental distributions are in fact described not by a single exponential, but by the sum  
194 of multiple exponential components with very different rate constants. Specifically, for the experiments in  
195 which  $[\sigma^{70}] > 0$  the distributions are well fit by a sum of three exponentials with characteristic rates  $k_{\text{slow}}$ ,  
196  $k_{\text{inter}}$ , and  $k_{\text{fast}}$  (Fig. S3). This suggests that in these experiments there are at least three types of RNAP-  
197  $\sigma^{70}$ -DNA complexes. The resulting fits, obtained using a maximum likelihood method, are shown in Fig.  
198 S4, and the fit parameters are summarized in Table 1. In all cases, non-specific binding of RNAP<sup>549</sup> to the  
199 chamber surface was minimal (Table S1), and therefore was not considered when fitting the data.

200 For the experiments with  $[\sigma^{70}] > 0$ ,  $k_{\text{fast}}$  showed a hyperbolic dependence of  $[\sigma^{70}]$  (Fig. 3D);  $k_{\text{inter}}$  and  
201  $k_{\text{slow}}$  did not (Table 1). Therefore, we hypothesize that the fastest component corresponds to  $\sigma^{70}$ -induced  
202 dissociation of RNAP<sup>549</sup> bound to DNA,  $k_{\text{eff}} = k_{\text{fast}}$ . This suggests that at low  $\sigma^{70}$  concentrations binding of  $\sigma^{70}$

**Table 1: Parameters for fits to dwell time distributions of RNAP<sup>549</sup>-promoterless DNA complexes at different  $\sigma^{70}$  concentrations.**

| $[\sigma^{70}]$ ( $\mu\text{M}$ ) | N   | N <sub>d</sub> | $a_{\text{fast}} (\times 10^{-1})$ | $a_{\text{inter}} (\times 10^{-1})$ | $k_{\text{fast}} (\times 10^{-2} \text{ s}^{-1})$ | $k_{\text{inter}} (\times 10^{-3} \text{ s}^{-1})$ | $k_{\text{slow}} (\times 10^{-4} \text{ s}^{-1})$ | DNA preparation                                    |
|-----------------------------------|-----|----------------|------------------------------------|-------------------------------------|---------------------------------------------------|----------------------------------------------------|---------------------------------------------------|----------------------------------------------------|
| 0                                 | 65  | 60             | 8.6(6.8 – 9.4)                     | -                                   | 0.16(0.13 – 0.22)                                 | -                                                  | 1.59(0 – 3.99)                                    | DNA <sub>Long</sub> <sup>Cy5</sup> , preparation 1 |
| 0.15                              | 60  | 42             | 1.2(0.4 – 2.0)                     | 1.6(0.4 – 2.9)                      | 1.63(1.24 – 2.26)                                 | 3.11(2.27 – 4.52)                                  | 1.90(1.44 – 2.33)                                 | DNA <sub>Long</sub> <sup>Cy5</sup> , preparation 2 |
| 0.30                              | 139 | 85             | 1.8(1.3 – 2.1)                     | 1.3(0.7 – 3.8)                      | 2.22(1.80 – 2.90)                                 | 1.23(0.53 – 2.04)                                  | 1.27(0.48 – 1.52)                                 | DNA <sub>Long</sub> <sup>Cy5</sup> , preparation 2 |
| 0.59                              | 106 | 100            | 3.4(2.5 – 4.8)                     | 5.4(4.1 – 6.2)                      | 2.59(1.52 – 3.77)                                 | 2.61(1.87 – 3.37)                                  | 2.18(0.26 – 3.63)                                 | DNA <sub>Long</sub> <sup>Cy5</sup> , preparation 1 |
| 0.74                              | 106 | 60             | 1.8(1.2 – 2.2)                     | 2.0(1.0 – 5.2)                      | 2.57(1.77 – 3.96)                                 | 0.81(0.34 – 1.72)                                  | 1.05(0 – 1.54)                                    | DNA <sub>Long</sub> <sup>Cy5</sup> , preparation 3 |
| 1.19                              | 74  | 71             | 3.4(2.3 – 4.9)                     | 5.8(4.4 – 6.8)                      | 3.90(2.47 – 5.47)                                 | 3.88(2.45 – 5.26)                                  | 1.61(0 – 3.24)                                    | DNA <sub>Long</sub> <sup>Cy5</sup> , preparation 1 |
| 1.19                              | 76  | 68             | 5.8(4.0 – 6.7)                     | 3.0(2.0 – 4.7)                      | 4.91(3.63 – 8.32)                                 | 5.77(4.03 – 10.09)                                 | 0.72(0 – 1.56)                                    | DNA <sub>Short</sub> <sup>Cy5</sup>                |

The models used for the fit are described in Methods (Eqs. 13 and 14). N is the number of DNA sites with co-localized RNAP that were used in the analysis. N<sub>d</sub> is the number of DNA sites for which the co-localized RNAPs disappeared before the end of the experiment. The values are presented with 68% CI. In some cases, the lower confidence limit on  $k_{\text{slow}}$  is poorly defined because  $k_{\text{slow}}^{-1}$  exceeds the duration of the experiment. DNA<sub>Long</sub><sup>Cy5</sup> preparations 1, 2, and 3 were made by the same method on different occasions.

203 to the sliding RNAP is rate-limiting so that the dissociation rate of RNAP from DNA increases linearly with  $\sigma^{70}$   
 204 concentration, while at high concentrations the dissociation of the RNAP- $\sigma^{70}$  complex from DNA becomes  
 205 limiting, and the dissociation rate saturates. Possible origins of the longer-lived RNAP-DNA complexes with  
 206  $[\sigma^{70}]$ -independent dissociation rates  $k_{\text{inter}}$  and  $k_{\text{slow}}$  are discussed in the Appendix S4.

207 To confirm that  $k_{\text{fast}}$  depends on  $[\sigma^{70}]$  and not on the DNA template used, we repeated the 1.19  $\mu\text{M}$   $\sigma^{70}$   
 208 experiment using a different DNA template, the promoterless 586 bp circular DNA<sub>Short</sub><sup>Cy5</sup>. Similar values were  
 209 obtained for  $k_{\text{fast}}$  for both templates (Table 1, Fig. 3D), supporting the idea that  $k_{\text{fast}}$  depends on  $\sigma^{70}$  con-  
 210 centration, and not on the length or sequence of the DNA template used.

211 Two characteristic rates were observed for the experiment with  $[\sigma^{70}] = 0$ . The slower one is similar to the  
 212 values of  $k_{\text{slow}}$  observed in the presence of  $\sigma^{70}$  (Table 1). The faster one is similar to the mean dissociation  
 213 rate observed for the post-termination RNAP-DNA complex in the absence of  $\sigma^{70}$ , as well as to the mean  
 214 dissociation rate observed for core RNAP sequence-nonspecifically bound to DNA<sup>16</sup>. Therefore, we assume  
 215 that the faster rate corresponds to the dissociation rate of RNAP<sup>549</sup> from DNA in the limit where  $[\sigma^{70}] = 0$ .

## 216 Extraction of model parameters $k_b$ , $k_{\text{off}}$ , and $k_{\text{off},s}$

217 Having established the hyperbolic dependence of the  $\sigma^{70}$ -induced dissociation rate  $k_{\text{fast}}$  on  $\sigma^{70}$  concentra-  
 218 tion, we can now determine the values for the Fig. 1 model parameters  $k_b$ ,  $k_{\text{off}}$ , and  $k_{\text{off},s}$ . For this, we jointly  
 219 fit the data from experiments at different  $\sigma^{70}$  concentrations to a global model that incorporates our con-  
 220 clusions about the origins of the different components of the dwell time distributions (see Appendix S4).  
 221 The  $\sigma^{70}$ -independent rates  $k_{\text{inter}}$  and  $k_{\text{slow}}$  were globally fit for all six experiments performed with DNA<sub>Long</sub><sup>Cy5</sup>  
 222 (Table S3 and Fig. S8). A separate set of parameters  $k'_{\text{inter}}$  and  $k'_{\text{slow}}$  were obtained by fitting the dwell time  
 223 distribution from the experiment with DNA<sub>Short</sub><sup>Cy5</sup>. The global model explicitly included the  $[\sigma^{70}]$  dependency  
 224 of  $k_{\text{fast}}$  (Eq. 12, where  $k_{\text{eff}} = k_{\text{fast}}$ ).

225 The model fit well to the data (Fig. S8) and gave well-constrained values for the rate constants (Table  
 226 2). The rate constants, together with the diffusion coefficient  $D$  measured in ref.<sup>16</sup> provide the information  
 227 needed to calculate the extent and kinetics of operon coupling.

**Table 2: Global model parameters.**

| Parameter          | Description                                            | Value (68% C.I.)                                         | Source |
|--------------------|--------------------------------------------------------|----------------------------------------------------------|--------|
| $D$                | Diffusion coefficient of sliding RNAP                  | $3.9 \times 10^4 \text{ bp}^2\text{s}^{-1}\dagger$       | 16     |
| $k_b$              | Binding rate of $\sigma^{70}$ to sliding RNAP          | $1.2(0.7 - 2.7) \times 10^5 \text{ M}^{-1}\text{s}^{-1}$ | Fit    |
| $k_{\text{off}}$   | Dissociation rate of RNAP before binding $\sigma^{70}$ | $1.6(1.3 - 1.9) \times 10^{-3} \text{ s}^{-1}$           | Fit    |
| $k_{\text{off},s}$ | Dissociation rate of RNAP- $\sigma^{70}$ complex       | $5.1(3.4 - 12.2) \times 10^{-2} \text{ s}^{-1}$          | Fit    |

$\dagger$ Kang et al<sup>17</sup> measured a somewhat lower value corresponding to  $0.8 \times 10^4 \text{ bp}^2\text{s}^{-1}$  at similar ionic strength but in a different buffer.

## 228 Extent of operon coupling by sliding RNAP

229 Operon coupling cannot be biologically functional if it takes an infeasibly long time for RNAP to find the  
 230 secondary promoter after terminating transcription at the terminator of the primary operon. To compute  
 231 the distribution of search times, we used the experimental results for  $D$ ,  $k_b$ ,  $k_{\text{off}}$ , and  $k_{\text{off},s}$  to simulate the  
 232 mechanism for a realistic  $\sigma^{70}$  concentration and terminator-promoter spacing (Fig. 4A). The distribution  
 233 of the search times is roughly exponential with a mean  $\langle t_f \rangle \sim 7$  s, which is comparable to the time for  
 234 transcription initiation at well-studied promoters (a few seconds to a few minutes<sup>26,27</sup>). This indicates that  
 235 transcription re-initiation by sliding RNAP is capable of effectively increasing expression of the secondary  
 236 operon.

237 Inputting the experimental results for  $D$ ,  $k_b$ ,  $k_{\text{off}}$ , and  $k_{\text{off},s}$  into Eq. 8, we can predict the value of the  
 238 efficiency as a function of the distance between operons and the  $\sigma^{70}$  concentration. The total concentration  
 239 of  $\sigma^{70}$  in *E. coli* is on order  $10 \mu\text{M}$ <sup>28</sup>, but its availability is highly regulated through sequestration by anti- $\sigma$   
 240 factors, whose activity is also tightly regulated. This means that at any time, the free  $\sigma^{70}$  concentration could  
 241 be anything below roughly  $10 \mu\text{M}$ . Thus, the free  $\sigma^{70}$  concentration in the cell could be either above or below  
 242  $[\sigma^{70}]_c$ , which we calculate to be  $0.4 \mu\text{M}$ . To test whether the model predicts appreciable coupling at typical  
 243 operon spacings, we calculated the predicted coupling efficiency as a function of the distance  $d$  between  
 244 the primary terminator and the secondary promoter at high and low  $\sigma^{70}$  concentrations (Figure 4B). At  $5$   
 245  $\mu\text{M}$   $\sigma^{70}$ , this calculation predicts efficient coupling at distances  $d$  up to  $1,000$  bp. At a much lower free  $\sigma^{70}$   
 246 concentration of  $50 \text{ nM}$ , the model predicts a smaller but still significant amount of coupling on this distance  
 247 scale, with less dependence on operon spacing. Regulation of the free  $\sigma^{70}$  concentration would therefore  
 248 allow the cell to vary the amount of coupling in response to internal and environmental conditions.

249 The spacing between the final terminator of an operon and the nearest operon initial promoter has a  
 250 broad distribution in the *E. coli* genome (Figure 4C). Nevertheless, based on our calculations, a large frac-  
 251 tion of these pairs are capable of efficient coupling by sliding RNAP. For example, 52% of the terminator-  
 252 promoter pairs are at distances where the coupling efficiency is at least 50% at  $[\sigma^{70}] = 5 \mu\text{M}$ . In other words, at  
 253 this  $\sigma^{70}$  concentration (and in general when  $[\sigma^{70}] \gg [\sigma^{70}]_c \approx 0.4 \mu\text{M}$ ) the predicted critical distance  $d_c \approx 1,000$   
 254 bp is of the same order of magnitude as the typical inter-operon distance (median 600 bp). This could allow  
 255 many pairs of adjacent operons in the genome to be coupled, while at the same time enabling other oper-  
 256 ons to be transcribed independently of their neighbors, depending on the terminator-promoter spacing.

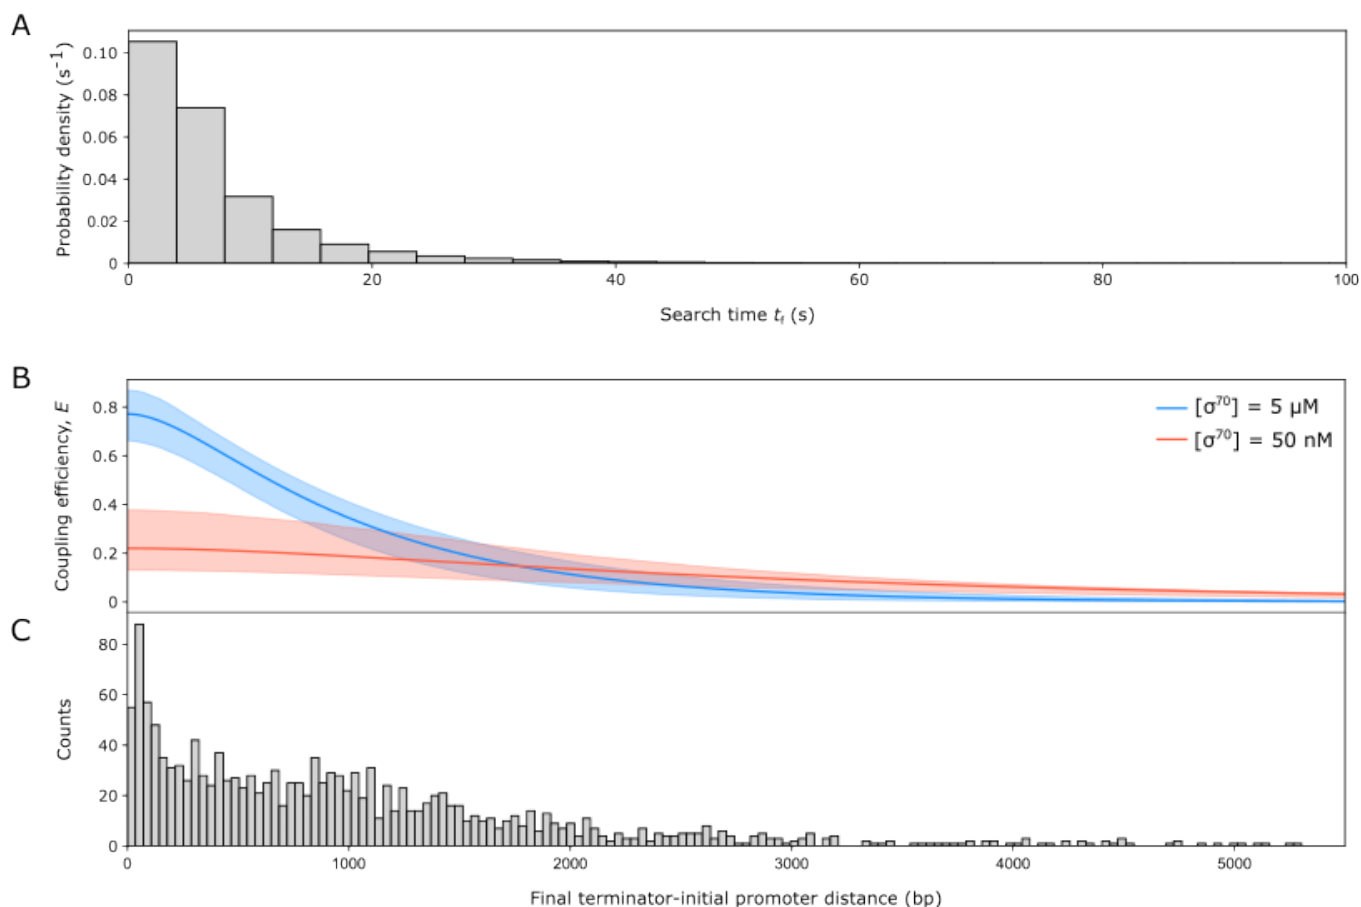

**Figure 4: Extent of operon coupling predicted by the sliding RNAP model, using the kinetic parameter values from Table 2.** **a.** Distribution of search times that end in a promoter encounter  $t_f$  obtained by simulating the model in Figure 1 for  $d = 600$  bp and  $[\sigma^{70}] = 5 \mu\text{M}$ . **b.** Coupling efficiency dependence on the distance  $d$  between primary operon terminator and secondary operon promoter, for two possible free  $\sigma^{70}$  concentrations. Shaded areas show the 68% C.I.s. **c.** Distribution of distances between operon final terminators and the nearest operon initial promoter in the *E. coli* genome determined from data in ref.<sup>29</sup>.

257 Thus, the model predicts significant coupling under relevant cellular conditions and predicts that coupling  
 258 can be regulated by tuning these conditions.

259 The model makes the simplifying assumption that every encounter of the RNAP- $\sigma^{70}$  complex with a  
 260 promoter is productive and leads to synthesis of a transcript. To the extent that not all encounters are  
 261 productive, the model will overestimate efficiency (Fig. 4B) and underestimate search time (Fig. 4A).

## 262 DISCUSSION

263 Using a combination of theory, stochastic simulations, and single-molecule microscopy experiments, we  
 264 characterized the potential spatial and temporal reach of transcriptional coupling between adjacent oper-  
 265 ons mediated by diffusive sliding of RNAP that remains bound to DNA following transcription termination.  
 266 We predict that  $\sigma^{70}$  has both stimulatory and inhibitory effects on reinitiation. The stimulatory effect arises  
 267 from the fact that only RNAP with bound  $\sigma^{70}$  can recognize the secondary promoter. On the other hand, we  
 268 show that RNAP- $\sigma^{70}$  has only a short lifetime on DNA, during which the sliding  $\sigma^{70}$ RNAP must find a pro-

269 moter on the fly to reinitiate transcription. Despite the latter difficulty, we show that reinitiation is expected  
270 to be common and efficient for physiological ranges of terminator-promoter spacings and  $\sigma^{70}$  concentra-  
271 tions. Thus, our results show that the proposed reinitiation mechanism is consistent with experiments that  
272 demonstrate reinitiation in vitro<sup>16,17</sup> and in vivo<sup>16</sup>.

273 To quantitatively define the reinitiation process, we measured three previously uncharacterized rate con-  
274 stants: the second-order rate constant for binding of  $\sigma^{70}$  to the RNAP-DNA complex,  $k_b = 1.2 \times 10^5 \text{ M}^{-1}\text{s}^{-1}$ ,  
275 the rate constant for the dissociation of the RNAP-DNA complex,  $k_{\text{off}} = 1.6 \times 10^{-3} \text{ s}^{-1}$ , and the rate constant  
276 for the dissociation of the RNAP- $\sigma^{70}$ -DNA complex,  $k_{\text{off},s} = 5.1 \times 10^{-2} \text{ s}^{-1}$ . The value obtained for  $k_b$  is an  
277 order of magnitude smaller than the rate constant of formation of a stable  $\sigma^{70}$ -RNAP complex in the ab-  
278 sence of DNA,  $1.5 \times 10^6 \text{ M}^{-1}\text{s}^{-1}$ <sup>21</sup>, which suggests that the presence of bound DNA significantly impedes  
279  $\sigma^{70}$  association with RNAP. The value obtained for  $k_{\text{off},s}$  is an order of magnitude smaller than the value  
280 obtained for  $k_1^D$ , the dissociation rate of the RNAP holoenzyme-DNA complex (see Appendix S4 and Ta-  
281 ble S2). This suggests that the RNAP- $\sigma^{70}$ -DNA complex (formed by RNAP-DNA binding  $\sigma^{70}$  from solution)  
282 and the holoenzyme-DNA complex (formed by mixing  $\sigma^{70}$  RNAP with non-promoter DNA) have different  
283 conformations, despite them having the same protein and DNA constituents. It is possible that in the two  
284 complexes different subsets of  $\sigma^{70}$  subregions interact with RNAP and/or DNA. More information, kinetic  
285 and structural, will be required to understand these differences.

286 The search for target sequences by proteins sliding on DNA has been demonstrated both in vitro and  
287 in vivo (e.g.,<sup>30,31</sup>). Post-termination sliding of core RNAP on DNA is atypically slow compared to a sample  
288 of other DNA binding proteins<sup>16,32</sup>, possibly because RNAP maintains an open bubble of non-base-paired  
289 DNA in the post-termination RNAP-DNA complex<sup>19</sup>. The presence in cells of sliding RNAP molecules that  
290 may take on order of 10 s after termination to reinitiate transcription (Fig. 4A) is consistent with demon-  
291 stration of a substantial population in vivo of slowly diffusing RNAP molecules that are neither bound to a  
292 fixed site on DNA nor freely diffusing in solution<sup>33,34</sup>.

293 Rapid, efficient reinitiation of transcription through sliding of post-termination RNAP over relevant ge-  
294 nomic distances may have significant implications for transcription homeostasis and regulation in both  
295 natural and engineered genomes. Under particular growth conditions, transcription activity is often con-  
296 centrated in clusters of genes or operons in confined genomic regions<sup>4,6,7,35,36</sup>. Sliding-mediated reinitia-  
297 tion may help to maintain a localized pool of RNAP molecules that are efficiently reused in these transcrip-  
298 tionally active regions. Indeed, the efficiency of reinitiation by sliding core RNAP compared to conventional  
299 initiation by RNAP holoenzyme from solution may be one of the factors that confers a selective advantage  
300 to the clustering of functionally related operons. In the context of synthetic biology, reinitiation by sliding  
301 might cause problems by giving rise to non-intended connectivity between transcription units that are  
302 intended to act modularly, but conversely could be used as a tool to introduce correlations in designed  
303 genetic circuits.

## 304 MATERIALS AND METHODS

### 305 Plasmids

306 Plasmid pDT4 is identical to pCDW116<sup>16</sup> except for mutation of CTGGAGTGCG to CTGGAGACCG to intro-  
307 duce a second Bsal site.

### 308 DNA templates

309 Circular DNA templates DNA<sub>Long</sub><sup>Cy5</sup> and DNA<sub>Short</sub><sup>Cy5</sup> were built by Golden Gate Assembly<sup>37</sup> using a plasmid or  
310 PCR product and a synthetic ‘ligator’ duplex oligonucleotide containing both dye and biotin modifications.  
311 Ligator was made by annealing two complementary oligonucleotides: 5'-CGATTAGGTCTCGGGCTAGTAC  
312 TGGTTTCTAGAG/iCy5/GTTCCAAGCC/iBiodTCACGGCGGCCGCCCATCGAGACCGGTTAACC-3' and 5'-GGTTA  
313 ACCGGTCTCGATGGGCGGCCCGCTGAGGCTTGGAACCTCTAGAAACCAGTACTAGCCCCGAGACCTAATCG-3'  
314 (IDT).

315 For making template DNA<sub>Long</sub><sup>Cy5</sup>, two identical Golden Gate Assembly reactions were carried out by mixing  
316 7  $\mu$ l of each  $\sim$  20 nM DT4 plasmid and  $\sim$  20 nM ligator fragment with 1  $\mu$ l of Golden Gate Mix (New England  
317 Biolabs) in T4 DNA Ligase Buffer (New England Biolabs), in total volumes of 20  $\mu$ l. The mixtures were incu-  
318 bated for alternating cycles of 5 min at 37°C and 10 min at 16°C 35 times, followed by 5 min at 55°C. After  
319 the reaction, the ligase was inactivated for 10 min at 65°C. The resulting 40  $\mu$ l of reaction product was mixed  
320 with 4  $\mu$ l of T5 Exonuclease (New England Biolabs) in NEB Buffer 4, to a total of 50  $\mu$ l and incubated at 37°C  
321 for 30 min. The digestion was stopped by adding 15 mM of EDTA, and a Qiagen PCR Cleanup Kit was used  
322 to remove the cleaved nucleotides and enzymes.

323 For making template DNA<sub>Short</sub><sup>Cy5</sup>, a linear DNA fragment was first amplified by PCR from plasmid pCDW114  
324 (<sup>16</sup>, Addgene #70061), using primers 5'-GAAGGTCTCCAGCCGTACCAACCAGCGGCTTATC-3' and 5'-CCGGG  
325 TCTCACCATACCCGCTGTCTGAGATTACG-3'. A Golden Gate Assembly reaction was carried out by mixing  
326 2  $\mu$ l of 343 nM PCR product, 0.6  $\mu$ l of 1  $\mu$ M ligator and 1  $\mu$ l of Golden Gate Mix in T4 DNA Ligase Buffer, in a  
327 total volume of 20  $\mu$ l. The mixture was incubated for alternating cycles of 5 min at 37°C and 10 min at 16°C 35  
328 times, followed by 5 min 55°C. After the reaction, the ligase was inactivated for 10 min at 65°C. The resulting  
329 reaction product was mixed with 1  $\mu$ l Exonuclease V (New England Biolabs) and 3  $\mu$ l of 10 mM ATP in NEB  
330 Buffer 4, in a total volume of 30  $\mu$ l, and incubated at 37°C for 30 min. Exonuclease V was then inactivated for  
331 30 min at 70°C. Finally, a Qiagen PCR Cleanup Kit was used to remove the cleaved nucleotides and enzymes.

### 332 Proteins

#### 333 Fluorescent labeling of core RNAP

334 *E. coli* core RNAP with a SNAP tag on the C-terminus of  $\beta$ '<sup>38</sup> (RNAP-SNAP, gift from the Robert Landick  
335 lab) was labeled with SNAP-Surface 549, yielding RNAP<sup>549</sup>, as follows: 13.65  $\mu$ M SNAP-RNAP (core) and 45.5  
336  $\mu$ M of SNAP-Surface 549 were mixed in a buffer containing 9 mM Tris-Cl<sup>-</sup> pH 7.9, 5 mM MgCl<sub>2</sub>, 1 mM DTT,  
337 20% glycerol, and 90 mM NaCl, and incubated for 30 min at room temperature. The sample was then mixed

338 with an equivalent amount of Dilution buffer (11 mM Tris-Cl<sup>-</sup> pH 8.0, 30% glycerol, 110 mM NaCl, 1 mM DTT),  
339 flash-frozen in liquid nitrogen and stored at -80°C.

#### 340 **Expression and purification of His-tagged $\sigma^{70}$**

341 His<sub>6</sub>-tagged *E. coli*  $\sigma^{70}$  ( $\sigma^{70}$ ) was overexpressed in T7 Express cells (New England Biolabs) as inclusion bodies  
342 from the pET-28a- $\sigma^{70}$  overexpression plasmid<sup>39</sup> by growing the cells at 37°C to an OD<sub>600</sub> of ~ 0.8, and then  
343 inducing by addition of IPTG to 0.4 mM. The temperature was decreased to 20°C and cells were left shaking at  
344 200 rpm overnight. Cells were then harvested by centrifugation at 4°C, followed by sonication in Lysis buffer  
345 (50 mM Tris-Cl<sup>-</sup>, pH 7.9, 5 mM imidazole, 5% [v/v] glycerol, 233 mM NaCl, 2 mM EDTA, 10 mM  $\beta$ -mercaptoethanol)  
346 plus 1× cComplete™ protease inhibitor cocktail (Roche). The lysate was centrifuged at 22,000 × *g* for 30 min  
347 at 4°C and the supernatant was discarded. To remove *E. coli* membrane and cell wall material, the pellet  
348 was resuspended in 10 ml of 2 M Urea Cleaning buffer (20 mM Tris-Cl<sup>-</sup> pH 8.0, 500 mM NaCl, 2 M urea, 2% Triton  
349 X-100, 10 mM  $\beta$ -mercaptoethanol) and sonicated. The resulting sample was centrifuged again at 22,000 × *g*  
350 for 30 min at 4°C and the supernatant was discarded. Four consecutive resuspension-centrifugation cycles  
351 were carried out, two of them in 2 M Urea Cleaning buffer, and the other two in Wash buffer (20 mM Tris-Cl<sup>-</sup>  
352 pH 8.0, 500 mM NaCl, 7% glycerol, 20 mM imidazole, 10 mM  $\beta$ -mercaptoethanol) to remove Triton X-100 from  
353 the pellet. To solubilize and denature the protein, the washed pellet was resuspended in 6 M Guanidine  
354 Binding buffer (20 mM Tris-Cl<sup>-</sup> pH 8.0, 500 mM NaCl, 5 mM imidazole, 6 M guanidine hydrochloride, 2 mM  
355  $\beta$ -mercaptoethanol), stirred for 1 hour, and centrifuged at 22,000 × *g* for 30 min at 4°C. The supernatant was  
356 passed through a 0.22  $\mu$ m filter and injected into a 1 ml HisTrap column (Cytiva Life Sciences), followed by a  
357 wash with Wash buffer supplemented with 6 M urea. Refolding of the bound protein was performed using  
358 a linear 1-hour-long 6 M to 0 M urea gradient in Wash buffer. The refolded protein was eluted with 500 mM  
359 imidazole in Wash buffer. The purified protein was dialyzed overnight into  $\sigma^{70}$  storage buffer (10 mM Tris-Cl<sup>-</sup>,  
360 pH 8.0, 30% [v/v] glycerol, 0.1 mM EDTA, 100 mM NaCl, 20  $\mu$ M ZnCl<sub>2</sub>, 1 mM MgCl<sub>2</sub>, 0.1 mM DTT) and aliquots  
361 were flash-frozen in liquid N<sub>2</sub> and stored at -80°C.

#### 362 **Fluorescent labeling of $\sigma^{70}$**

363 An N-terminal His<sub>6</sub>-tagged single-cysteine derivative of *E. coli*  $\sigma^{70}$  (C132S C291S C295S S366C)<sup>40</sup> (see Ap-  
364 pendix S4) was overexpressed and purified following the same protocol used for  $\sigma^{70}$ . The purified protein  
365 was concentrated 5× using an Amicon Ultra-0.5ml 30K filter by centrifuging for 11 minutes at 14,000 × *g*  
366 at 4°C. For fluorescent labeling, the concentrated protein was mixed with Cy5-maleimide dye (Cytiva) (1:15  
367 protein:dye ratio), incubated first for 10 min at room temperature, and then left overnight at 4° C. The excess  
368 dye was then removed using a Centrispin 20 column (Princeton Separations). After addition of glycerol and  
369 BSA to 30% and 1 mg/ml respectively, the samples were flash-frozen in liquid N<sub>2</sub>, and aliquots were stored  
370 at -80°C.

### 371 **Reconstitution of doubly-labeled holoenzyme**

372 Cy5- $\sigma^{70}$  RNAP<sup>549</sup> holoenzyme (see Appendix S4) was reconstituted by incubating 121 nM of RNAP<sup>549</sup> and  
373 280 nM of Cy5- $\sigma^{70}$  for 30 min at 37°C.

### 374 **Colocalization Single-Molecule Spectroscopy (CoSMoS) Experiments**

375 Single-molecule total internal reflection fluorescence microscopy was performed<sup>41</sup> at excitation wave-  
376 lengths 532 and 633 nm, for observation of DNA<sup>Cy5</sup> template (and/or Cy5- $\sigma^{70}$ ) and RNAP<sup>549</sup>, respectively;  
377 focus was automatically maintained<sup>42</sup>. A stage heating device was used to keep the samples at 30°C.  
378 Single-molecule observations were performed in glass flow chambers (volume  $\sim$  30  $\mu$ l) passivated with a  
379 mPEG-SG2000:biotin-PEG-SVA5000 (Laysan Bio) 200 : 1 w/w mixture as described in<sup>43</sup>. Neutravidin (#21125;  
380 Life Technologies) was introduced at 220 nM in KO buffer (50 mM TrisOAc, 100 mM KOAc, 8 mM Mg(OAc)<sub>2</sub>, 27  
381 mM NH<sub>4</sub>(OAc), 0.1 mg/ml bovine serum albumin (BSA) (#126615 EMB Chemicals), pH 8.0), incubated for 45  
382 s, and washed out (this and all subsequent wash steps used two washes each of two chamber volumes of  
383 KO buffer). The chamber was then incubated with  $\sim$ 1 nM Cy5-DNA (DNA<sup>Cy5</sup><sub>Short</sub> or DNA<sup>Cy5</sup><sub>Long</sub>) in KO buffer for  
384  $\sim$  20 min and washed out with Imaging buffer (KO buffer supplemented with an O<sub>2</sub> scavenging system: 4.5  
385 mg/ml glucose, 40 units/ml glucose oxidase, and 1,500 units/ml catalase<sup>43</sup>).

386 For the experiments to measure the dwell time of RNAP<sup>549</sup> on DNA at different concentrations of  $\sigma^{70}$ ,  
387  $\sim$  1 nM of RNAP<sup>549</sup> was introduced into the chamber in Imaging buffer supplemented with 3.5% w/v PEG  
388 8,000 and 1 mg/ml BSA for  $\sim$  10 min. Image acquisition was performed by alternating 1 s exposures to 532  
389 and 633 nm, at 450 and 200  $\mu$ W respectively (all laser powers were measured incident to the micromirror  
390 optics), and the flow chamber was washed with Imaging buffer supplemented with 3.5% w/v PEG 8,000  
391 and containing 0, 148 nM, 297 nM, 593 nM, 741 nM or 1.19  $\mu$ M of  $\sigma^{70}$ . In the cases where the concentration  
392 of  $\sigma^{70}$  was lower than 1.19  $\mu$ M, the appropriate amount of  $\sigma^{70}$  storage buffer was added in replacement so  
393 that all experiments were performed at the same solute concentrations: 47.0 mM TrisOAc, pH 8.0, 93.0 mM  
394 KOAc, 7.4 mM Mg(OAc)<sub>2</sub>, 25 mM NH<sub>4</sub>(OAc), 3% w/v 8,000 PEG, 0.2 mM Tris-Cl<sup>-</sup>, 2.0 mM NaCl, 0.4  $\mu$ M ZnCl<sub>2</sub>, 20  
395  $\mu$ M MgCl<sub>2</sub>, 4.5 mg/ml glucose, 40 units/ml glucose oxidase, 1,500 units/ml catalase, 0.6% glycerol, 2  $\mu$ M EDTA,  
396 0.1 mg/ml BSA, 2 mM DTT, 10 nM DTT-quenched Cy5.5 maleimide dye.

397 The experiments to measure dwell time of  $\sigma^{70}$  RNAP on DNA (see Appendix S4) were performed similarly  
398 to the ones described in the previous paragraph, with three differences. First, a photobleaching step was  
399 performed after DNA surface attachment. Cy5 photobleaching was induced by 633 nm excitation at  $\sim$  1  
400 mW in the presence of Imaging buffer without DTT. Second, instead of  $\sigma^{70}$ ,  $\sim$  1 nM of Cy5- $\sigma^{70}$  RNAP<sup>549</sup>  
401 (which also contained an additional 1.5 nM Cy5- $\sigma^{70}$ ) was introduced into the chamber in Imaging buffer  
402 supplemented with 3.5% w/v PEG 8,000 and no subsequent wash was performed. The final composition of  
403 the solution was 47.5 mM of TrisOAc, pH 8.0, 95.1 mM KOAc, 7.4 mM Mg(OAc)<sub>2</sub>, 25.7 mM NH<sub>4</sub>(OAc), 3.3% w/v  
404 8,000 PEG, 0.1 mg/ml BSA, 1 mM DTT, 0.1 mM Tris-Cl<sup>-</sup>, 0.3% glycerol, 1 mM NaCl, 8  $\mu$ M MgCl<sub>2</sub>, 36 nM ZnCl<sub>2</sub>, 1.8  $\mu$ M



405 EDTA, 1.1 nM SNAP-RNAP, 2.5 nM unreacted SNAP-Surface 549, 2.5 nM Cy5- $\sigma^{70}$ , 4.5 mg/ml glucose, 40 units/ml  
406 glucose oxidase, 1,500 units/ml catalase. Third, image acquisition was performed by continuous exposure  
407 to 532 and 633 nm lasers, at 450 and 200  $\mu$ W respectively, at an acquisition rate of 1 frame per second.

#### 408 **CoSMoS Data analysis**

409 Analysis of CoSMoS video recordings was done using custom software and algorithms for mapping be-  
410 tween wavelength channels, spatial drift correction, and detection of spot colocalization as described<sup>41</sup>. In  
411 each recording, we selected DNA<sub>Long</sub><sup>Cy5</sup> or DNA<sub>Short</sub><sup>Cy5</sup> fluorescence spots that co-localized with RNAP<sup>549</sup> spots  
412 at  $t = 0$ . For the selected DNA molecules, we computed RNAP<sup>549</sup> fluorescence intensity time records by  
413 summing the intensity over  $3 \times 3$  pixel squares centered at DNA molecule locations in each recorded frame.  
414 Fluorescence intensity values were corrected for background fluorescence and non-uniform illumination  
415 across the microscope field of view, yielding normalized values for spot intensities<sup>44</sup>. This allowed us to  
416 directly compare integrated intensity values for different spots located throughout the field of view. The  
417 numbers of decreasing intensity steps in the resulting time traces were counted to assess the initial num-  
418 ber of RNAP<sup>549</sup> molecules present at each DNA molecule location (Fig. S2A). Records that showed more  
419 than a single RNAP<sup>549</sup> molecule bound at  $t = 0$  were excluded from subsequent analysis. The times of the  
420 first image with no spot at each DNA location were taken to be the dwell times of the RNAP<sup>549</sup> molecules  
421 present at the beginning of the recording. Spots that persisted until the end of the recording were sepa-  
422 rately counted as censored dwell times equal to the recording duration.

#### 423 **Fits to RNAP-DNA complex dwell time distributions**

424 The probability distribution of RNAP-DNA complex dwell times measured in each individual experiment  
425 was modeled as the sum of two exponential terms

$$426 \quad f_1 = a_{\text{fast}} k_{\text{fast}} \exp(-k_{\text{fast}} t) + (1 - a_{\text{fast}}) k_{\text{slow}} \exp(-k_{\text{slow}} t) \quad (13)$$

427 or the sum of three exponential terms

$$428 \quad f_2 = a_{\text{fast}} k_{\text{fast}} \exp(-k_{\text{fast}} t) + a_{\text{inter}} k_{\text{inter}} \exp(-k_{\text{inter}} t) \quad (14) \\ + (1 - a_{\text{inter}} - a_{\text{fast}}) k_{\text{slow}} \exp(-k_{\text{slow}} t) .$$

429 For each distribution, lifetimes of RNAP<sup>549</sup> binding events that terminated by disappearance of the fluo-  
430 rescent spot, and those that were censored by the end of the experiment, were jointly fit using the maximum  
431 likelihood algorithm by an approach analogous to the one used in<sup>45</sup>. Confidence intervals were calculated  
432 by bootstrapping<sup>41</sup>.

### 433 Extraction of model parameters $k_b$ , $k_{off}$ , and $k_{off,s}$

434 To get values for  $k_b$ ,  $k_{off}$ , and  $k_{off,s}$ , we globally fit dwell times collected at all concentrations of  $\sigma^{70}$  to the  
 435 models in equation 13 (for  $[\sigma^{70}] = 0$ ) or equation 14 (for  $[\sigma^{70}] > 0$ ), where  $k_{fast}$  was explicitly constrained to  
 436 depend on  $[\sigma^{70}]$ :

$$437 \quad k_{fast} = k_{off} + \frac{k_{off,s} k_b [\sigma^{70}]}{k_{off,s} + k_b [\sigma^{70}]} \quad (15)$$

438 In this formulation,  $k_{inter}$  and  $k_{slow}$  are assumed to be independent of  $[\sigma^{70}]$ , and therefore were globally fit  
 439 across distributions obtained for template DNA<sub>Long</sub><sup>Cy5</sup>. For the experiment performed with template DNA<sub>Short</sub><sup>Cy5</sup>,  
 440 we fit independent values  $k'_{inter}$  and  $k'_{slow}$  for these parameters. Censored data were treated using the same  
 441 approach as described above for the individual experiment fits to dwell time distributions.

### 442 Fit to holoenzyme-DNA dwell time distribution

443 To account for non-specific binding of holoenzyme to the glass flow chamber (see Appendix S4), we first  
 444 randomly selected locations on the chamber surface that did not contain DNA molecules. We then fit the  
 445 distribution of dwell times for Cy5- $\sigma^{70}$  RNAP<sup>549</sup> holoenzyme molecules bound at these non-DNA locations  
 446 to a biexponential model

$$447 \quad f_{nD}(t) = [a_1^{nD} k_1^{nD} \exp(-k_1^{nD} t) + (1 - a_1^{nD}) k_2^{nD} \exp(-k_2^{nD} t)] / f_{nD}^0, \quad (16)$$

448 with

$$449 \quad f_{nD}^0 = a_1^{nD} \exp(-k_1^{nD} t_{min}) + (1 - a_1^{nD}) \exp(-k_2^{nD} t_{min}), \quad (17)$$

450 where  $f_{nD}(t)$  is normalized so that it integrates to 1 over all dwell times  $t$  greater than the minimum de-  
 451 tectable dwell time  $t_{min} = 0.2$  s.

452 By analogy to<sup>41</sup>, the dwell time distribution for Cy5- $\sigma^{70}$  RNAP<sup>549</sup> at DNA locations was then fit to the  
 453 background-corrected model

$$454 \quad f_D(t) = (F_D - F_{nD}) [a_1^D k_1^D \exp(-k_1^D t) + a_2^D k_2^D \exp(-k_2^D t) + (1 - a_1^D - a_2^D) k_3^D \exp(-k_3^D t)] / f_D^0 + F_{nD} f_{nD}^{ML}(t), \quad (18)$$

455 with

$$456 \quad f_D^0 = a_1^D \exp(-k_1^D t_{min}) + a_2^D \exp(-k_2^D t_{min}) + (1 - a_1^D - a_2^D) \exp(-k_3^D t_{min}), \quad (19)$$

457 where  $F_D$  and  $F_{nD}$  represent the total binding frequency at DNA and non-DNA locations, respectively, and

458  $f_{nD}^{ML}$  stands for  $f_{nD}$  evaluated on the maximum likelihood estimators obtained by fitting the non-DNA lo-  
459 cations data. As before, we jointly fit the censored and uncensored data using the maximum likelihood  
460 method<sup>45</sup>.

#### 461 **Simulation of search times**

462 In order to calculate the mean search time  $\langle t_f \rangle$  required for the RNAP to find the secondary promoter, we  
463 used numerical simulations of the mechanism depicted in Fig. 1. In particular, we used the Gillespie algo-  
464 rithm<sup>46</sup> to generate the stochastic trajectory of an RNAP molecule on a DNA molecule. In the simulation,  
465 the state of the system is characterized by the position of the RNAP on DNA and whether it is bound to  $\sigma^{70}$   
466 or not. Initially, the RNAP is at position  $x = 0$  (which corresponds to the position of the terminator from the  
467 primary transcription unit), and it is not bound to  $\sigma^{70}$ . We then draw a time  $t_1$  at random from an exponen-  
468 tial distribution with  $p(t) = \lambda \exp(-\lambda t)$  with  $\lambda = k_b[\sigma^{70}] + k_{off}$ , and choose between two possible transitions:  
469 binding  $\sigma^{70}$  or dissociating from the DNA. Which of the transitions takes place is chosen at random accord-  
470 ing to their relative weights  $\frac{k_b[\sigma^{70}]}{k_b[\sigma^{70}] + k_{off}}$  and  $\frac{k_{off}}{k_b[\sigma^{70}] + k_{off}}$ . If the RNAP dissociates from the DNA, its attempt to  
471 find the secondary promoter is considered unsuccessful, and the simulation starts over with a new trial. If  
472 the RNAP binds  $\sigma^{70}$ , the position on the DNA  $x_1$  at which binding occurs is dependent on the amount of  
473 diffusion away from the primary terminator.  $x_1$  is determined by drawing at random from a normal dis-  
474 tribution with mean  $\mu = 0$  and variance  $\text{var} = 2Dt_1$ . The time  $t_2$  that is required to diffuse from  $x_1$  to the  
475 secondary promoter located at  $x_p$  is then drawn at random from the first passage time density

$$476 \quad p(t_2) = \frac{|x_p - x_1|}{\sqrt{4\pi Dt_2}} \exp\left(-\frac{(x_p - x_1)^2}{4Dt_2}\right).$$

477 An RNAP- $\sigma^{70}$  complex dissociation time  $t_3$  is drawn at random from an exponential distribution with  $\lambda =$   
478  $k_{off,s}$ . If  $t_2 < t_3$ , the RNAP- $\sigma$  complex is considered to have found the secondary promoter at time  $t_f = t_1 + t_2$ .  
479 If  $t_2 > t_3$ , the attempt to find the secondary promoter was unsuccessful. The whole process is repeated  
480 multiple times, generating a distribution of search times.

#### 481 **Genome-wide analysis of terminator-promoter distances**

482 Using the promoter and terminator annotations reported by Conway et al<sup>29</sup>, we measured the distance of  
483 each operon-ending terminator to the nearest operon initial promoter in the *E. coli* genome.

#### 484 **ACKNOWLEDGMENTS**

485 We thank Bob Landick, and Rachel Mooney, and for providing us with plasmids and proteins. We would  
486 like to thank members of the Landick, Kondev and Gelles labs for insightful discussion. We are grateful  
487 to Johnson Chung for help with microscopy, and with Liuyu Chen for help in plasmid preparation. This  
488 work was funded by grants from NIGMS (R01 GM081648 to J.G.), from NSF (DMR-1610737 to JK), and  
489 the Simons Foundation (to JK).

## 490 AUTHOR CONTRIBUTIONS

491 D.T., L.F., J.G. and J.K. designed the research; D.T., K.I. and A.C. performed the research. D.T. analyzed the  
492 data; D.T., J.G., and J.K. drafted the manuscript and all authors contributed to writing the final version.

## 493 AUTHOR COMPETING INTERESTS

494 The authors declare no competing interests.

495

## 496 REFERENCES

- 497 [1] A Feklistov, BD Sharon, SA Darst, CA Gross, Bacterial sigma factors: A historical, structural, and genomic perspective. *Annual*  
498 *Review of Microbiology* **68**, 357–376 (2014).
- 499 [2] RR Burgess, AA Travers, JJ Dunn, EK Bautz, Factor stimulating transcription by RNA polymerase. *Nature* **221**, 43–46 (1969).
- 500 [3] DF Browning, SJ Busby, Local and global regulation of transcription initiation in bacteria. *Nature Reviews Microbiology* **14**,  
501 638–650 (2016).
- 502 [4] M Fischbach, CA Voigt, Prokaryotic gene clusters: A rich toolbox for synthetic biology. *Biotechnology Journal* **5**, 1277–1296  
503 (2010).
- 504 [5] F Jacob, D Perrin, C Sanchez, J Monod, L'opéron: groupe de gènes à expresion coordonnée par un opérateur. *Comptes Rendus*  
505 *Academie des Sciences Paris* **250**, 514–520 (1960).
- 506 [6] H Zhang, Y Yin, V Olman, Y Xu, Genomic Arrangement of Regulons in Bacterial Genomes. *PLOS ONE* **7**, e29496 (2012).
- 507 [7] Y Yin, H Zhang, V Olman, Y Xu, Genomic arrangement of bacterial operons is constrained by biological pathways encoded in the  
508 genome. *Proceedings of the National Academy of Sciences of the United States of America* **107**, 6310–6315 (2010).
- 509 [8] M Zampieri, N Soranzo, D Bianchini, C Altafini, Origin of co-expression patterns in *E. coli* and *S. cerevisiae* emerging from reverse  
510 engineering algorithms. *PLoS ONE* **3**, 1–10 (2008).
- 511 [9] JO Korbil, LJ Jensen, CV Mering, P Bork, Analysis of genomic context: Prediction of functional associations from conserved  
512 bidirectionally transcribed gene pairs. *Nature Biotechnology* **22**, 911–917 (2004).
- 513 [10] L Pannier, E Merino, K Marchal, J Collado-Vides, Effect of genomic distance on coexpression of coregulated genes in *E. coli*. *PLoS*  
514 *ONE* **12**, 1–20 (2017).
- 515 [11] S Kruglyak, H Tang, Regulation of adjacent yeast genes. *Trends in Genetics* **16**, 109–111 (2000).
- 516 [12] EJ Williams, DJ Bowles, Coexpression of Neighboring Genes in the Genome of *Arabidopsis thaliana*. *Genome Research* **14**,  
517 1060–1067 (2004).
- 518 [13] LF Liu, JC Wang, Supercoiling of the DNA template during transcription. *Proceedings of the National Academy of Sciences of*  
519 *the United States of America* **84**, 7024–7027 (1987).
- 520 [14] J Tan, L Shu, HY Wu, Activation of the *leu-500* promoter by adjacent transcription. *Journal of Bacteriology* **176**, 1077–1086  
521 (1994).
- 522 [15] KY Rhee, et al., Transcriptional coupling between the divergent promoters of a prototypic LysR-type regulatory system, the *ilvYC*  
523 operon of *Escherichia coli*. *Proceedings of the National Academy of Sciences of the United States of America* **96**, 14294–14299  
524 (1999).
- 525 [16] TT Harden, et al., Alternative transcription cycle for bacterial RNA polymerase. *Nature Communications* **11**, 448 (2020).
- 526 [17] W Kang, et al., Transcription reinitiation by recycling RNA polymerase that diffuses on DNA after releasing terminated RNA.  
527 *Nature Communications* **11**, 450 (2020).
- 528 [18] W Kang, S Hwang, JY Kang, C Kang, S Hohng, Hopping and flipping of rna polymerase on dna during recycling for reinitiation  
529 after intrinsic termination in bacterial transcription. *International Journal of Molecular Sciences* **22**, 1–13 (2021).
- 530 [19] L You, et al., Structural basis for intrinsic transcription termination. *Nature* 2023 pp. 1–7 (2023).

- 531 [20] H Maeda, N Fujita, A Ishihama, Competition among seven Escherichia coli subunits: relative binding affinities to the core RNA  
532 polymerase. *Nucleic Acids Research* **28**, 3497–3503 (2000).
- 533 [21] FYH Wu, LR Yarbrough, CW Wu, Conformational Transition of Escherichia coli RNA Polymerase Induced by the Interaction of  $\sigma$   
534 Subunit with Core Enzyme. *Biochemistry* **15**, 3254–3258 (1976).
- 535 [22] S Redner, *A Guide to First-Passage Processes*. (Cambridge University Press), (2001).
- 536 [23] KM Arndt, MJ Chamberlin, Transcription termination in Escherichia coli. *Journal of Molecular Biology* **202**, 271–285 (1988).
- 537 [24] K Inlow, D Tenenbaum, L Friedman, J Kondev, J Gelles, Mechanism of Post-Termination Recycling of E. coli RNA Polymerase by  
538 the Swi2/Snf2 ATPase RapA (manuscript in preparation). (2023).
- 539 [25] V Vogt, Breaks in DNA stimulate transcription by core RNA polymerase. *Nature* **223**, 854–855 (1969).
- 540 [26] S Choubey, J Kondev, A Sanchez, Distribution of Initiation Times Reveals Mechanisms of Transcriptional Regulation in Single  
541 Cells. *Biophysical Journal* **114**, 2072–2082 (2018).
- 542 [27] I Golding, J Paulsson, SM Zawilski, EC Cox, Real-time kinetics of gene activity in individual bacteria. *Cell* **123**, 1025–1036 (2005).
- 543 [28] IL Grigorova, NJ Phleger, VK Mutalik, CA Gross, Insights into transcriptional regulation and sigma competition from an equi-  
544 librium model of RNA polymerase binding to DNA. *Proceedings of the National Academy of Sciences of the United States of*  
545 *America* **103**, 5332–5337 (2006).
- 546 [29] T Conway, et al., Unprecedented high-resolution view of bacterial operon architecture revealed by RNA sequencing. *mBio* **5**  
547 (2014) e01442-14.
- 548 [30] PC Blainey, AM Van Oijen, A Banerjee, GL Verdine, XS Xie, A base-excision DNA-repair protein finds intrahelical lesion bases by fast  
549 sliding in contact with DNA. *Proceedings of the National Academy of Sciences of the United States of America* **103**, 5752–5757  
550 (2006).
- 551 [31] P Hammar, et al., The lac repressor displays facilitated diffusion in living cells. *Science* **336**, 1595–1598 (2012).
- 552 [32] PC Blainey, et al., Nonspecifically bound proteins spin while diffusing along DNA. *Nature Structural and Molecular Biology* **16**,  
553 1224–1229 (2009).
- 554 [33] M Stracy, et al., Live-cell superresolution microscopy reveals the organization of RNA polymerase in the bacterial nucleoid. *Pro-*  
555 *ceedings of the National Academy of Sciences of the United States of America* **112**, E4390–E4399 (2015).
- 556 [34] M Stracy, et al., Transient non-specific DNA binding dominates the target search of bacterial DNA-binding proteins. *Molecular*  
557 *cell* **81**, 1499–1514 (2021).
- 558 [35] G Fang, EP Rocha, A Danchin, Persistence drives gene clustering in bacterial genomes. *BMC Genomics* **9**, 4 (2008).
- 559 [36] P Nicolas, et al., Condition-dependent transcriptome reveals high-level regulatory architecture in Bacillus subtilis. *Science* **335**,  
560 1103–1106 (2012).
- 561 [37] KA Padgett, JA Sorge, Creating seamless junctions independent of restriction sites in PCR cloning. *Gene* **168**, 31–35 (1996).
- 562 [38] LE Tetone, et al., Dynamics of GreB-RNA polymerase interaction allow a proofreading accessory protein to patrol for transcription  
563 complexes needing rescue. *Proceedings of the National Academy of Sciences of the United States of America* **114**, E1081–  
564 E1090 (2017).
- 565 [39] JP Mumm, LJ Friedman, J Gelles, Mechanism of upstream promoter element stimulation of transcription at a ribosomal RNA  
566 promoter determined by single-molecule imaging. *bioRxiv* (2020) doi: <https://doi.org/10.1101/2020.02.17.953182>.
- 567 [40] S Callaci, E Heyduk, T Heyduk, Conformational Changes of Escherichia coli RNA Polymerase 70 Factor Induced by Binding to  
568 the Core Enzyme. *Journal of Biological Chemistry* **273**, 32995–33001 (1998).
- 569 [41] LJ Friedman, J Gelles, Multi-wavelength single-molecule fluorescence analysis of transcription mechanisms. *Methods (San*  
570 *Diego, Calif.)* **86**, 27 (2015).
- 571 [42] DJ Crawford, AA Hoskins, LJ Friedman, J Gelles, MJ Moore, Visualizing the splicing of single pre-mRNA molecules in whole cell  
572 extract. *RNA (New York, N.Y.)* **14**, 170–179 (2008).
- 573 [43] LJ Friedman, J Gelles, Mechanism of transcription initiation at an activator-dependent promoter defined by single-molecule  
574 observation. *Cell* **148**, 679–689 (2012).

- 575 [44] LD Jesús-Kim, et al., DDK regulates replication initiation by controlling the multiplicity of Cdc45-GINS binding to Mcm2-7. *eLife*  
576 **10**, 1–83 (2021).
- 577 [45] JP Bombardier, et al., Single-molecule visualization of a formin-capping protein 'decision complex' at the actin filament barbed  
578 end. *Nature communications* **6**, 8707 (2015).
- 579 [46] DT Gillespie, Exact stochastic simulation of coupled chemical reactions. *Journal of Physical Chemistry* **81**, 2340–2361 (2002).

# 1 **Supporting Information for**

## 2 **RNA polymerase sliding on DNA can couple the transcription of nearby bacterial operons**

3 **Debora Tenenbaum, Koe Inlow, Larry Friedman, Anthony Cai, Jeff Gelles, Jane Kondev**

4 **Corresponding authors: Jeff Gelles, Jane Kondev**

5 **E-mail: [gelles@brandeis.edu](mailto:gelles@brandeis.edu), [kondev@brandeis.edu](mailto:kondev@brandeis.edu)**

### 6 **This PDF file includes:**

7 Supporting text

8 Figs. S1 to S8

9 Tables S1 to S3

10 SI References

## 11 Supporting Information Text

### 12 Appendix S1: Approximation of coupling distance $d_c^{\approx}$ for the case $[\sigma^{70}] \approx [\sigma^{70}]_c$ .

13  $d_c^{\approx}$  is defined in the main text as the distance for which the coupling efficiency  $E$  decays by a factor of  $e$ :  $E(d_c^{\approx}) = E(0)e^{-1}$ ,  
 14 which in this case converts to

$$15 \quad k_b[\sigma^{70}] \exp\left(-\sqrt{\frac{k_{\text{off},s}}{D}} d_c^{\approx}\right) [d_c^{\approx} (\sqrt{k_{\text{off},s} D})^{-1} + k_{\text{off},s}^{-1}] = k_b[\sigma^{70}] / (e k_{\text{off},s}). \quad [1]$$

16 Defining  $x = \sqrt{\frac{k_{\text{off},s}}{D}} d_c^{\approx}$ , this reduces to the equation,

$$17 \quad e^{x-1} = x + 1, \quad [2]$$

18 whose solution is given by

$$19 \quad x = -W(-e^{-2}) - 1, \quad [3]$$

20 where  $W(z)$  is the product log function. The only real positive solution to eqn. 3 is given by

$$21 \quad x = -W_{-1}(-e^{-2}) - 1 \approx 2.15, \quad [4]$$

22 which gives  $d_c^{\approx} \approx 2.15 \sqrt{\frac{D}{k_{\text{off},s}}}$ .

### 23 Appendix S2: General approximation of coupling distance.

24 Values for model parameters  $D$ ,  $k_b[\sigma^{70}]$ ,  $k_{\text{off}}$ , and  $k_{\text{off},s}$  were randomly drawn from log-uniform distributions in the ranges:

$$25 \quad D : (10^3 - 10^6) \text{ bp}^2 \text{ s}^{-1}$$

$$26 \quad k_b[\sigma^{70}] : (10^{-3} - 10^2) \text{ s}^{-1}$$

$$27 \quad k_{\text{off}} : (10^{-4} - 1) \text{ s}^{-1}$$

$$28 \quad k_{\text{off},s} : (10^{-3} - 10^2) \text{ s}^{-1}.$$

29 The characteristic coupling distance  $d_c$  (i.e., the distance for which the coupling efficiency decreases by a factor of  $e$ ) was  
 30 numerically calculated from Eq. 8, and plotted against the approximated value  $\sqrt{D(k_b[\sigma^{70}] + k_{\text{off}})^{-1}} + \sqrt{D(k_{\text{off},s})^{-1}}$  (Fig.  
 31 S1), confirming that the coupling distance can be approximated by

$$32 \quad d_c \approx \sqrt{D(k_b[\sigma^{70}] + k_{\text{off}})^{-1}} + \sqrt{D(k_{\text{off},s})^{-1}} \quad [5]$$

33 for all parameter values tested.

### 34 Appendix S3: Selection of DNA templates that colocalized with a single RNAP<sup>549</sup> molecule at $t = 0$ .

35 Because of the length of the DNA<sup>Cy5</sup> templates employed (3,033 bp for DNA<sub>Long</sub><sup>Cy5</sup> and 586 bp for DNA<sub>Short</sub><sup>Cy5</sup>), multiple RNAP<sup>549</sup>  
 36 could be bound to the same DNA molecule simultaneously. We restricted the analysis to those DNA<sub>Long</sub><sup>Cy5</sup> or DNA<sub>Short</sub><sup>Cy5</sup> spots  
 37 that colocalized with a single RNAP<sup>549</sup> molecule at  $t = 0$ .

38 To quantify the number of RNAP<sup>549</sup> molecules bound to each DNA, We used the integrated fluorescence time records.  
 39 In the cases where the RNAP<sup>549</sup> spots present at  $t = 0$  disappeared during the duration of the experiment, the number of  
 40 decreasing intensity steps was counted. Fig. S2A shows examples for one and two RNAP<sup>549</sup> molecules present initially. DNA  
 41 templates containing more than two RNAP<sup>549</sup> molecules bound were rare.

42 For the cases in which the RNAP<sup>549</sup> spots present at  $t = 0$  did not disappear during the experiment, the absolute integrated  
 43 intensity value was used to estimate the number of RNAP<sup>549</sup> molecules present (Fig. S2B).

### 44 Appendix S4: Experimental evidence for and interpretation of the intermediate and slow dwell time distribution components

46 In addition to the  $\sigma^{70}$ -dependent component characterized by the dissociation rate  $k_{\text{fast}}$ , we observed components in the  
 47 RNAP-DNA dwell time distributions that did not change systematically with  $\sigma^{70}$  concentration. We investigated the origin  
 48 of these  $\sigma^{70}$ -independent components as follows:

49 Our preparation of RNAP<sup>549</sup> showed low levels of  $\sigma^{70}$ , indicating contamination of the core RNAP with  $\sigma^{70}$  RNAP holoenzyme  
 50 (Fig. S5). This raised the possibility that RNAP dwell time components with the  $\sigma^{70}$ -independent rate constants  $k_{\text{inter}}$   
 51 and/or  $k_{\text{slow}}$  are due to  $\sigma^{70}$  RNAP. To test this hypothesis, we measured the dwell times of  $\sigma^{70}$  RNAP on DNA and compared  
 52 them to dwell time components measured for the RNAP- $\sigma^{70}$ -DNA (RNAP-DNA complex that had bound  $\sigma^{70}$  from solution).  
 53 Specifically, we performed a control experiment with doubly-labeled  $\sigma^{70}$  RNAP holoenzyme (Cy5- $\sigma^{70}$  RNAP<sup>549</sup>) on template  
 54 DNA<sub>Long</sub><sup>Cy5</sup> (Fig. S6A) and scored only dwell times at DNA locations where there was simultaneous colocalization of RNAP<sup>549</sup>  
 55 and Cy5- $\sigma^{70}$  spots. This criterion excluded from our measurements dwell times of core RNAP molecules that did not have



56 bound  $\sigma^{70}$ . When the Cy5- $\sigma^{70}$  fluorescent spot disappeared before the corresponding RNAP<sup>549</sup> spot (e.g., Fig. S6B, right),  
57 the dwell time of the latter was measured.

58 In this experiment, roughly 10 – 15% of DNA<sub>Long</sub><sup>Cy5</sup> spots showed colocalization with more than one RNAP<sup>549</sup> molecule  
59 bound simultaneously, often accompanied by Cy5- $\sigma^{70}$ , at some intervals during the recording. To simplify the interpretation  
60 of the data, we removed those records from the analysis, retaining only records that showed at most one core RNAP molecule  
61 at a time (e.g., Fig. S6B).

62 A fit of the resulting dwell time distribution (Fig. S6C) to a three-exponential background-corrected model (Eq. 18) (1)  
63 yielded the rate constants shown in Table S2. The fastest rate  $k_1^D$  is approximately consistent with time constants previously  
64 observed for  $\sigma^{70}$ RNAP on nonspecific DNA (2).  $k_2^D$  and  $k_3^D$  are approximately  $k_{inter}$  and  $k_{slow}$ , respectively (Figs. S6D and  
65 E). This is consistent with the hypothesis that  $k_{inter}$  and  $k_{slow}$  are due to the minor  $\sigma^{70}$  contamination of the SNAP-RNAP  
66 sample used, and do not represent  $\sigma^{70}$ -induced dissociation of RNAP from DNA.

67 The relative amount of the component with rate constant  $k_{slow}$ ,  $a_{slow} = 1 - a_{fast} - a_{inter}$ , was roughly constant across  
68 experiments that used the same DNA preparation, even when  $[\sigma^{70}]$  was different. Unexpectedly,  $a_{slow}$  was different between  
69 experiments using different preparations of the same DNA, and was almost absent in one of them (Fig. S7A). We propose  
70 that the events from this longest time component are due to stable binding of RNAP<sup>549</sup> or  $\sigma^{70}$ RNAP<sup>549</sup> to some kind of  
71 imperfections in a fraction of the DNA molecules, such as nicks or gaps, which may be a consequence of the method used to  
72 prepare the DNAs and therefore will in general differ in abundance for different DNA preparations. In contrast, the fraction  
73 of the other (i.e., non-slow) dwells that are in the intermediate component,  $a_{inter}/(a_{inter} + a_{fast})$ , was roughly constant for  
74 two different DNA<sub>Long</sub><sup>Cy5</sup> preparations and for the two different DNA sequences, DNA<sub>Long</sub><sup>Cy5</sup> and DNA<sub>Short</sub><sup>Cy5</sup> (Fig. S7B). A possible  
75 explanation for the binding events with characteristic dissociation rate  $k_{inter}$  is that they arise from holoenzyme binding to  
76 rare tight binding sequences (3–5) that may be present in both of the DNA circles tested. More experiments will be needed  
77 to test this hypothesis.

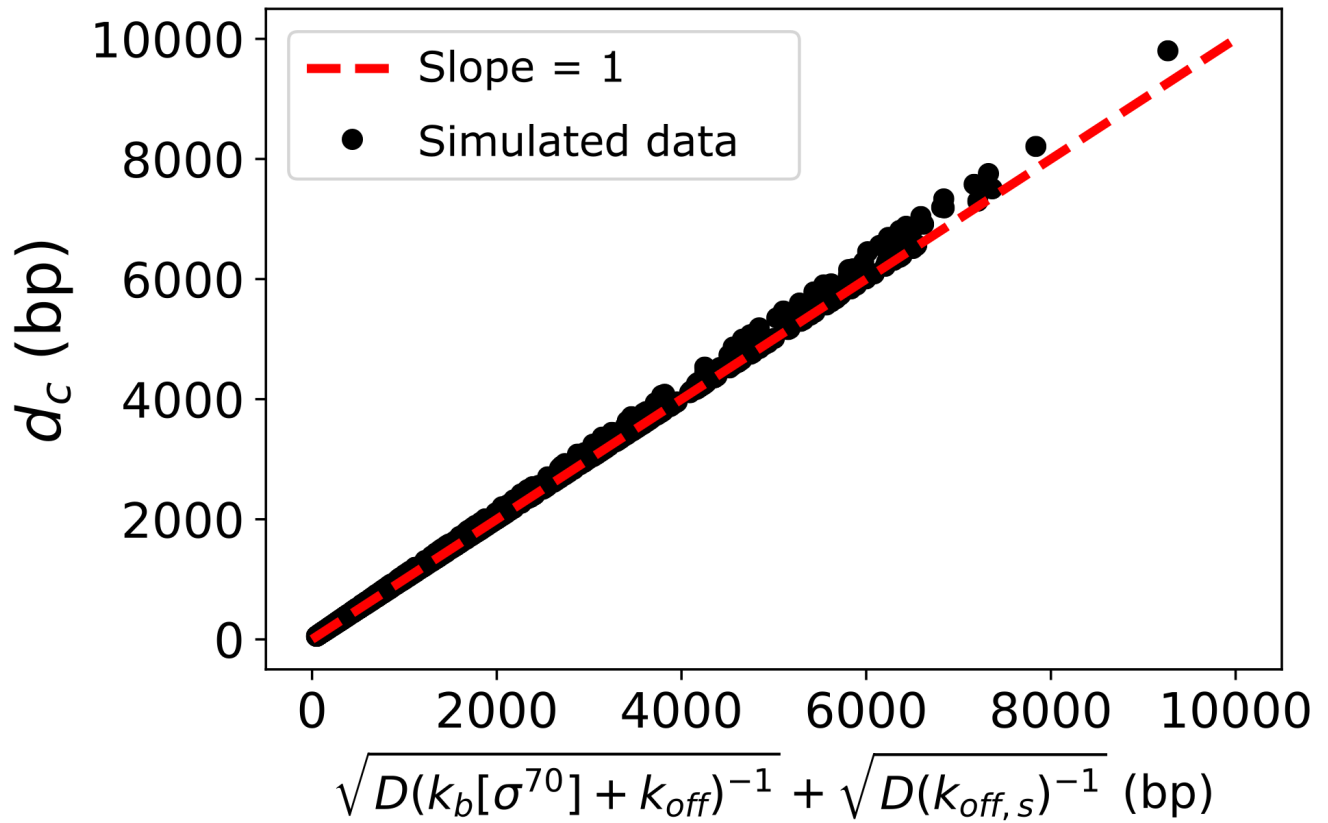

**Fig. S1. Approximation of coupling distance  $d_c$ .** Coupling distance was numerically calculated from Equation 8 as the value of  $d$  over which the efficiency  $E$  decreases by a factor of  $e$ , using parameter values chosen at random (black dots, see Appendix S2). That exact calculation agrees well with our approximate expression for  $d_c$  (red line), confirming that  $d_c$  can be approximated by  $\sqrt{D(k_b[\sigma^{70}] + k_{off})^{-1}} + \sqrt{D(k_{off,s})^{-1}}$ .

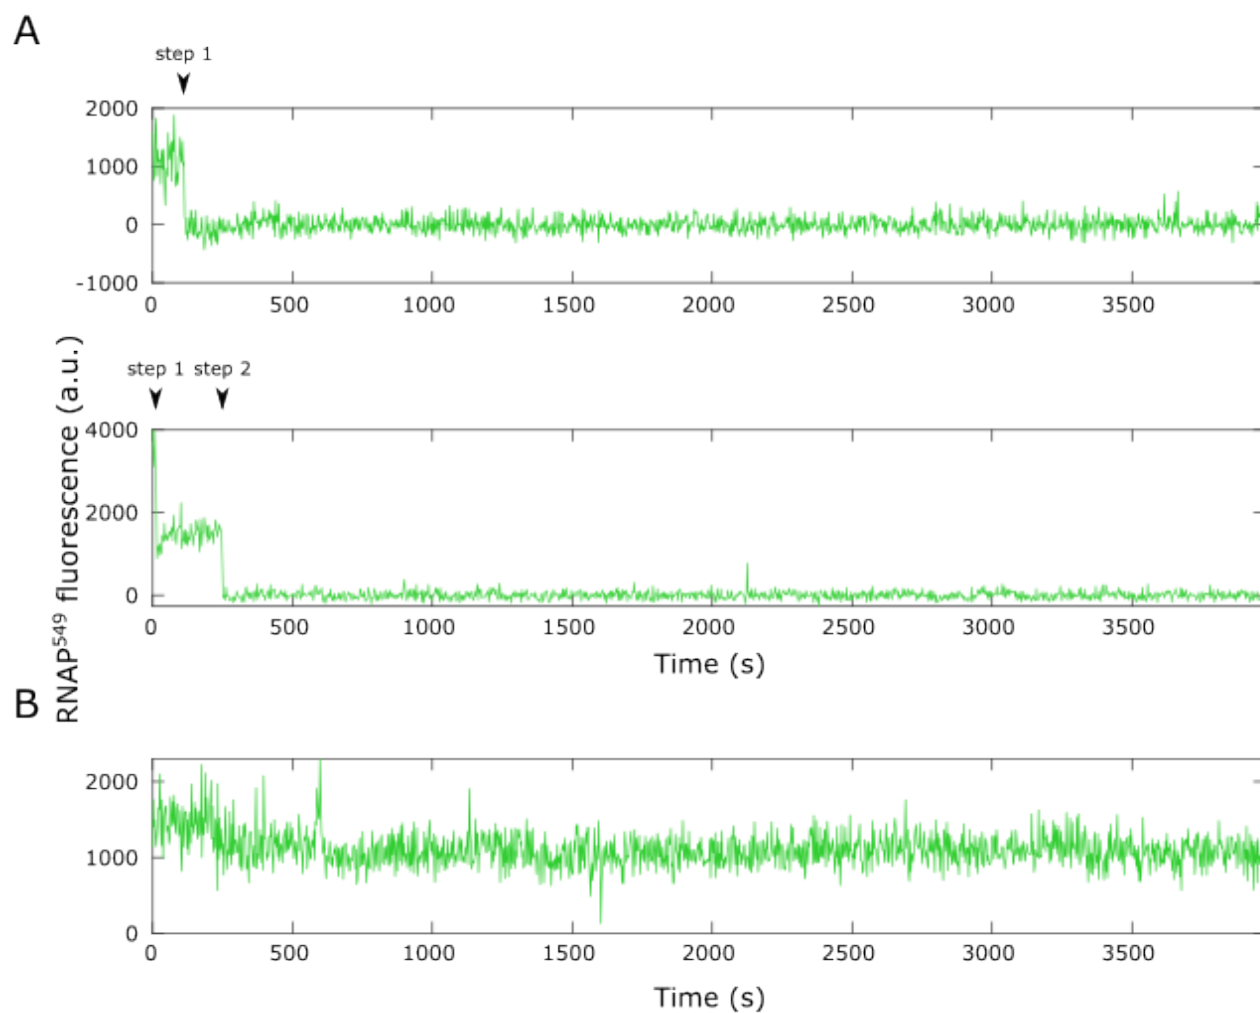

**Fig. S2. Counting the number of RNAP<sup>549</sup> molecules bound to an individual DNA molecule at  $t = 0$ .** **A.** Records showing one (top) and two (bottom) RNAP<sup>549</sup> molecules that dissociate or photobleach during the experiment. **B.** Record showing a single RNAP<sup>549</sup> molecule that lasts throughout the experiment, as indicated by the roughly constant normalized fluorescence intensity of  $\sim 1,000$ . In all records, zero fluorescence corresponds to the diffuse background fluorescence detected in the absence of a DNA-colocalized RNAP<sup>549</sup> molecule.

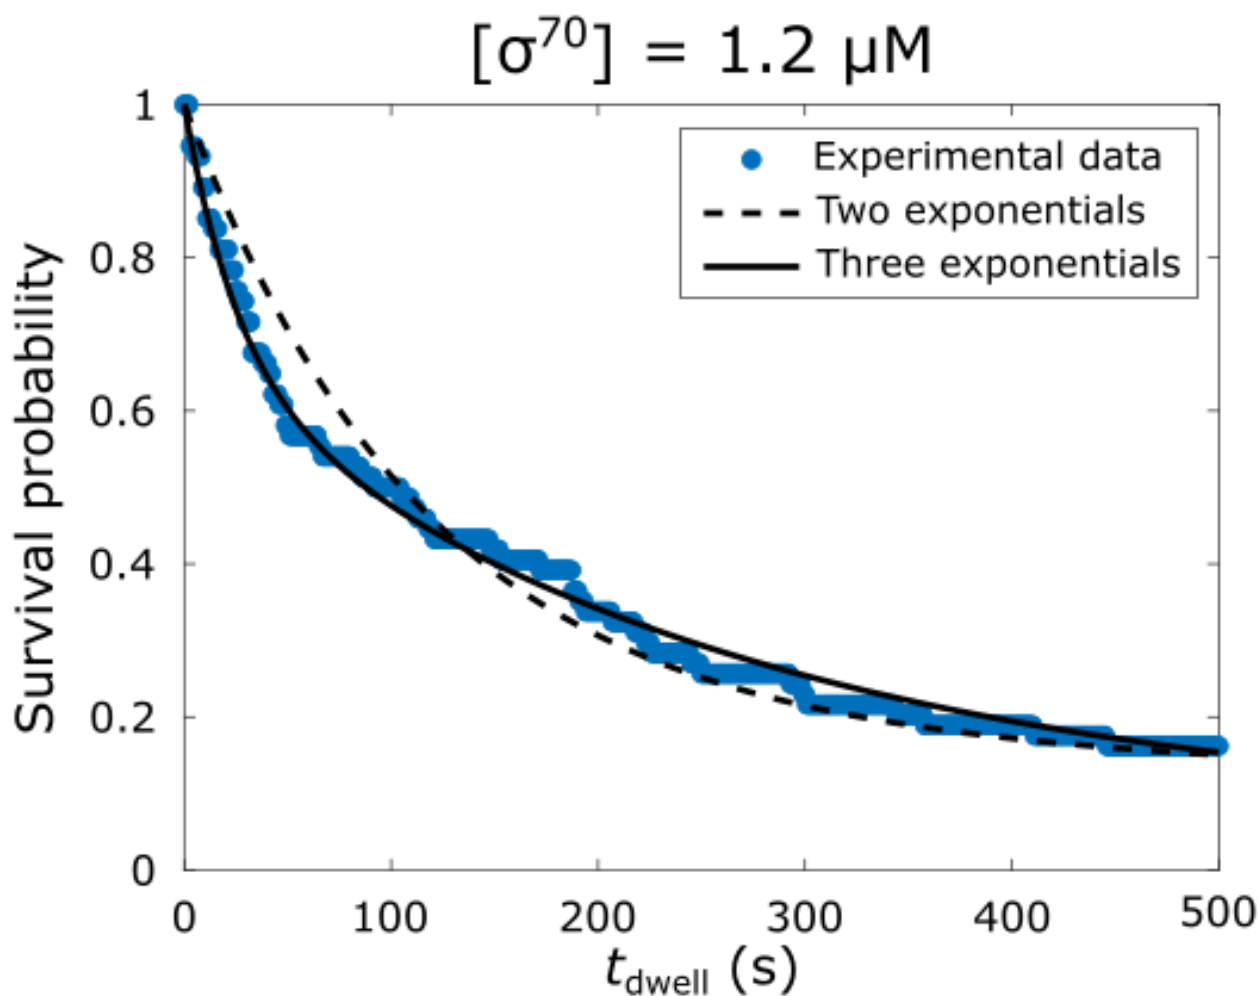

**Fig. S3. Comparison between two-exponential and three-exponential fits to an example RNAP<sup>549</sup> – DNA<sup>Cys</sup><sub>Long</sub> dwell time distribution.** The distribution obtained at 1.19  $\mu\text{M}$   $\sigma^{70}$  (blue) was fit to a sum of two exponentials model (Eq. 13 with  $a_{\text{fast}} = 8.2(6.9-9.2) \times 10^{-1}$ ,  $k_{\text{fast}} = 8.7(6.0-14.2) \times 10^{-3} \text{ s}^{-1}$ ,  $k_{\text{slow}} = 4.7(1.2-10.0) \times 10^{-4} \text{ s}^{-1}$ ; dashed line) and a sum of three exponentials model (Eq. 14 with  $a_{\text{fast}} = 3.4(2.4-4.9) \times 10^{-1}$ ,  $k_{\text{fast}} = 3.9(2.4-5.4) \times 10^{-2} \text{ s}^{-1}$ ,  $a_{\text{inter}} = 5.8(4.4-6.7) \times 10^{-1}$ ,  $k_{\text{inter}} = 3.9(2.5-5.2) \times 10^{-3} \text{ s}^{-1}$ ,  $k_{\text{slow}} = 1.6(0-3.5) \times 10^{-4} \text{ s}^{-1}$ ; solid line). The values are presented with 68% C.I.s.

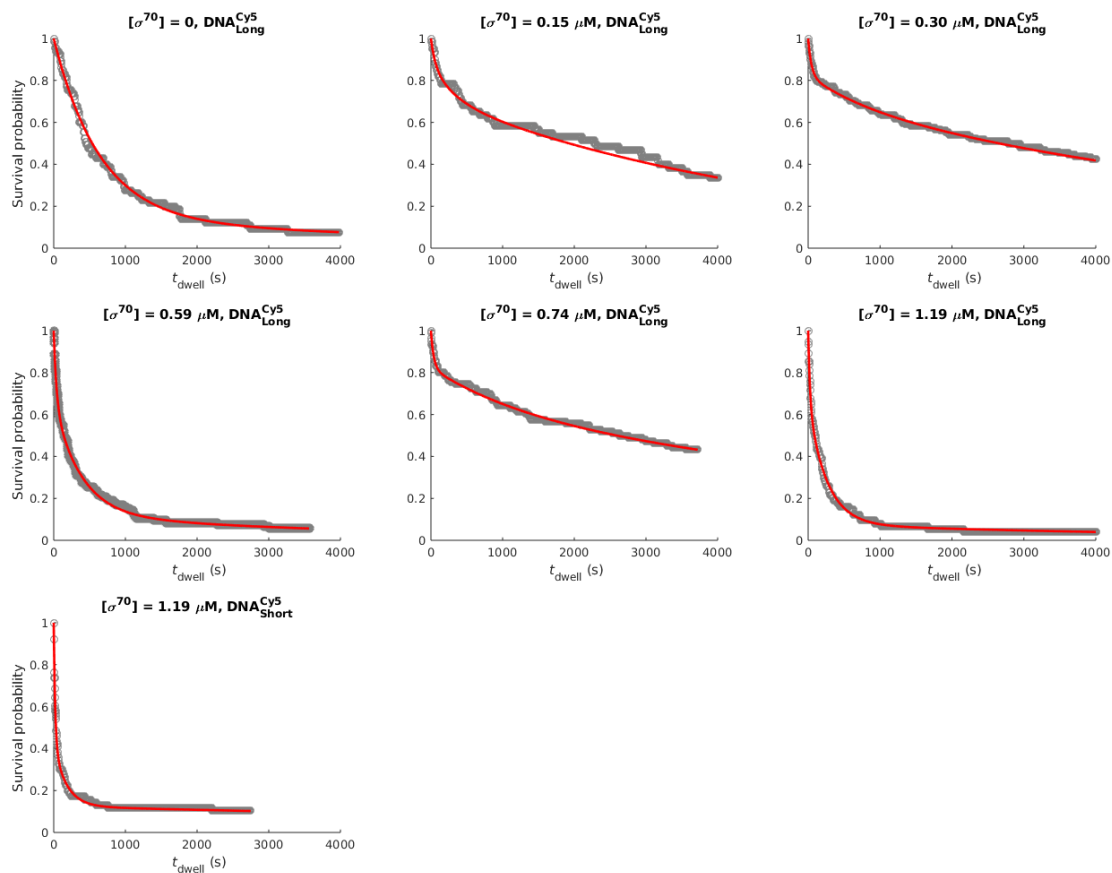

**Fig. S4.** RNAP<sup>549</sup> – DNA dwell time distributions and local fits with two different DNA constructs in the presence of different concentrations of  $\sigma^{70}$ . Each distribution was fit to the sum of two exponentials (for  $[\sigma^{70}] = 0$ ) or the sum of three exponentials (for  $[\sigma^{70}] > 0$ ). The fit parameters are reported in Table 1.

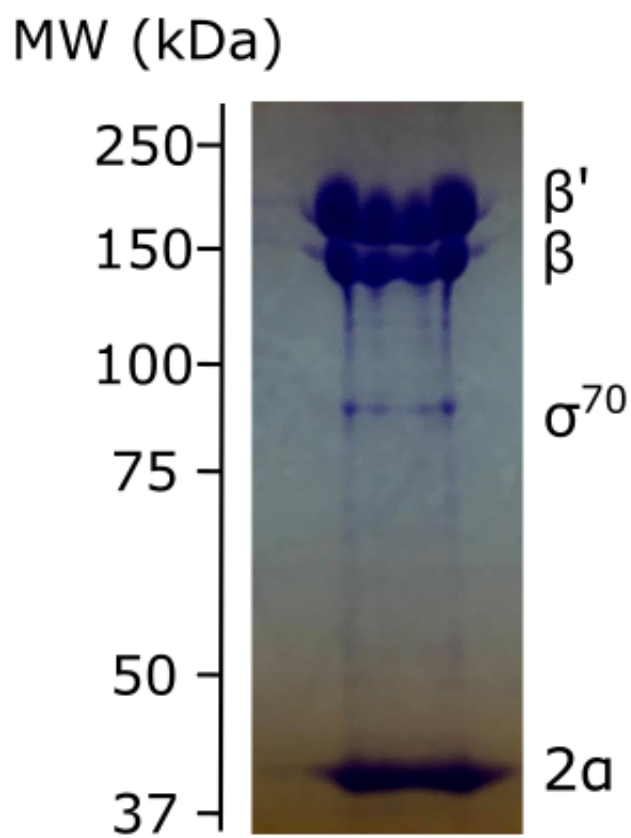

**Fig. S5. Extent of  $\sigma^{70}$  contamination in the RNAP-SNAP preparation used in this study.** Densitometry of the Coomassie-Blue stained SDS-PAGE gel indicates the presence of  $\sigma^{70}$  at  $\sim 7.5$  mole percent of core.

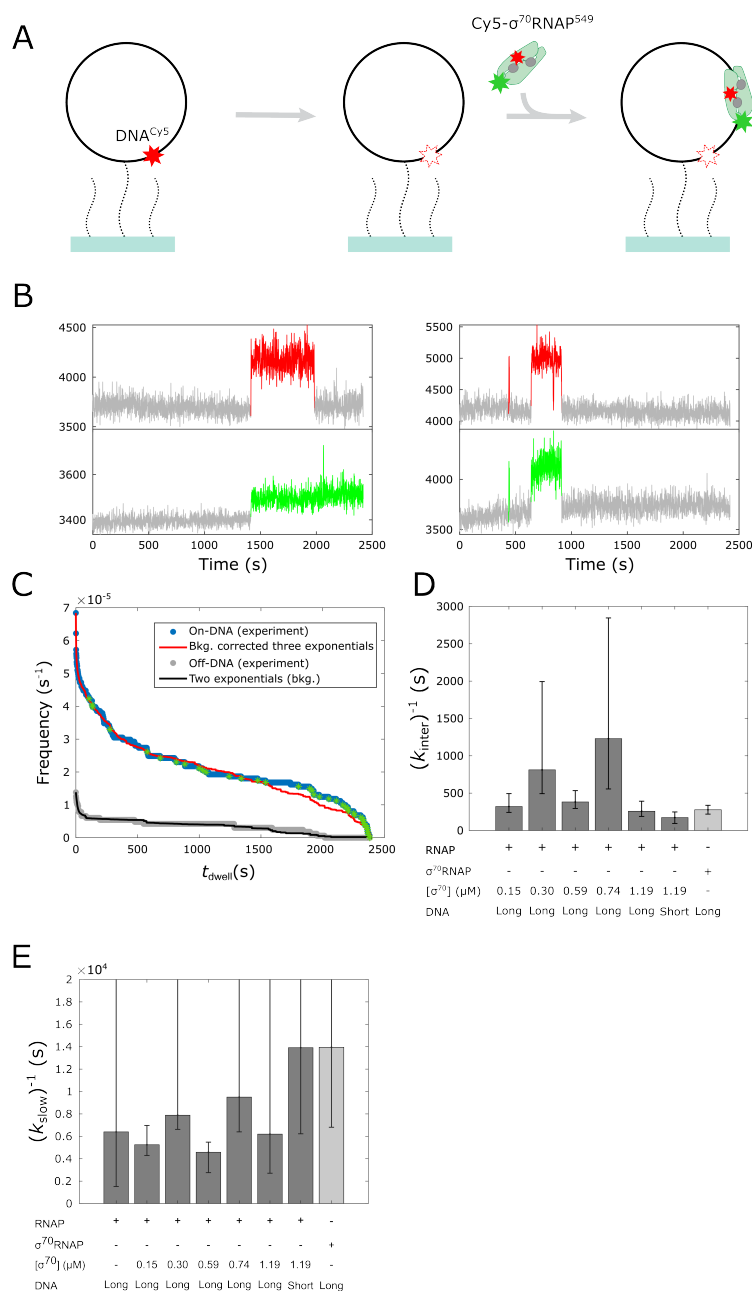

**Fig. S6. Control experiment with doubly-labeled  $\sigma^{70}$  RNAP holoenzyme.** See Appendix S4. **A.** Experiment design. Fluorescently labeled, promoterless circular DNA molecules ( $\text{DNA}_{\text{Long}}^{\text{Cy5}}$ ; black circles with red stars) were tethered to the surface of a glass flow chamber (blue) through polyethylene glycol linkers (dotted black curves). After recording the position of the DNA molecules, the fluorescent dye was photobleached (white star). Doubly-labeled RNAP holoenzyme  $\text{Cy5-}\sigma^{70}\text{RNAP}^{549}$  was added and two-color fluorescence time records were acquired. **B.** Examples of two-color  $\text{Cy5-}\sigma^{70}\text{RNAP}^{549}$  fluorescence time records recorded at the locations of two individual DNA molecules. Time intervals in which the fluorescently labeled protein subunits were detected are indicated (color). **C.** Cumulative frequency distributions for  $\text{Cy5-}\sigma^{70}\text{RNAP}^{549}$  molecules binding to  $\text{DNA}_{\text{Long}}^{\text{Cy5}}$  (blue) or binding to non-DNA positions (gray) with a dwell time greater than or equal to the specified value. Stars indicate censored dwell times that last until the end of the experiment. Figure also shows a two-exponential distribution function (black) fit to the non-DNA data and a three-exponential background-corrected distribution function (red) fit to the DNA data (1). **D.** Distribution function plots were numerically simulated to include the effects of censoring. The fit parameters are summarized in Table S2. **D.** The characteristic durations (with 68% C.I.s) of intermediate-length binding events from experiments with unlabeled  $\sigma^{70}$  (dark gray; Fig. 3A;  $k_{\text{inter}}$  in table 1) is consistent with the characteristic duration of intermediate-length specific binding events of  $\text{Cy5-}\sigma^{70}\text{RNAP}^{549}$  holoenzyme (light gray; see panel C;  $k_2$  in Table S2). **E.** Same as D, but for long-duration time constants. While C.I. lower bounds are well determined, most of the C.I. upper bounds are poorly defined because the reciprocal rate constants exceeded the durations of the experiments, which range from 2, 749 s to 4, 570 s.

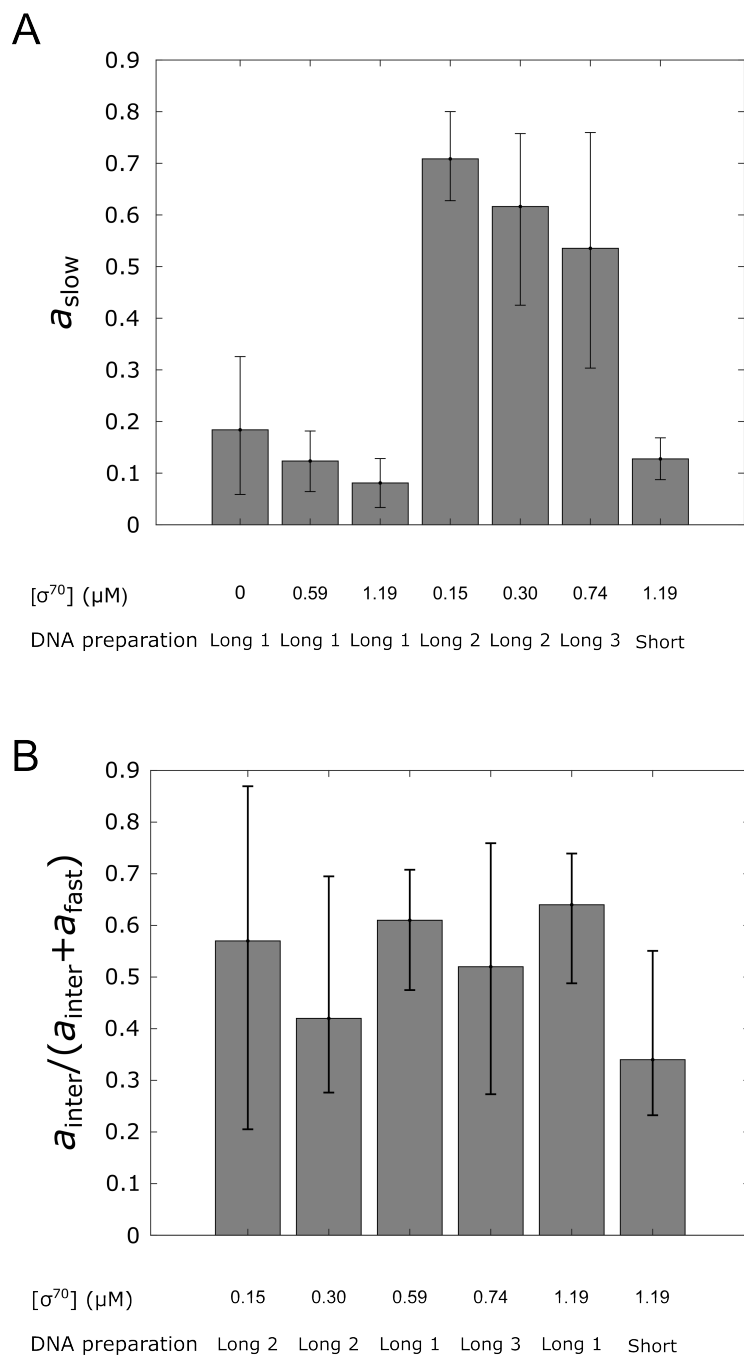

**Fig. S7. Amplitudes of the slow and intermediate dwell time components in experiments with different DNA preparations and different  $[\sigma^{70}]$ .** **A.** Relative amplitude of the slow dissociation component  $a_{\text{slow}}$  for experiments performed using three different preparations of circular DNA  $\text{DNA}_{\text{Long}}^{\text{Cy5}}$ , all built following the same protocol, and one preparation of  $\text{DNA}_{\text{Short}}^{\text{Cy5}}$ . The value of  $a_{\text{slow}} = 1 - a_{\text{inter}} - a_{\text{fast}}$  (Eq. 14) depends on the DNA templates preparation used, supporting the hypothesis that the longest binding events are due to stable binding to imperfections in some of the DNA molecules. **B.** Fraction of the non-slow dwells that are in the intermediate component, as given by  $a_{\text{inter}} / (a_{\text{inter}} + a_{\text{fast}})$  in the same experiments as in (A). This quantity is roughly constant across experiments on all DNA constructs and preparations.



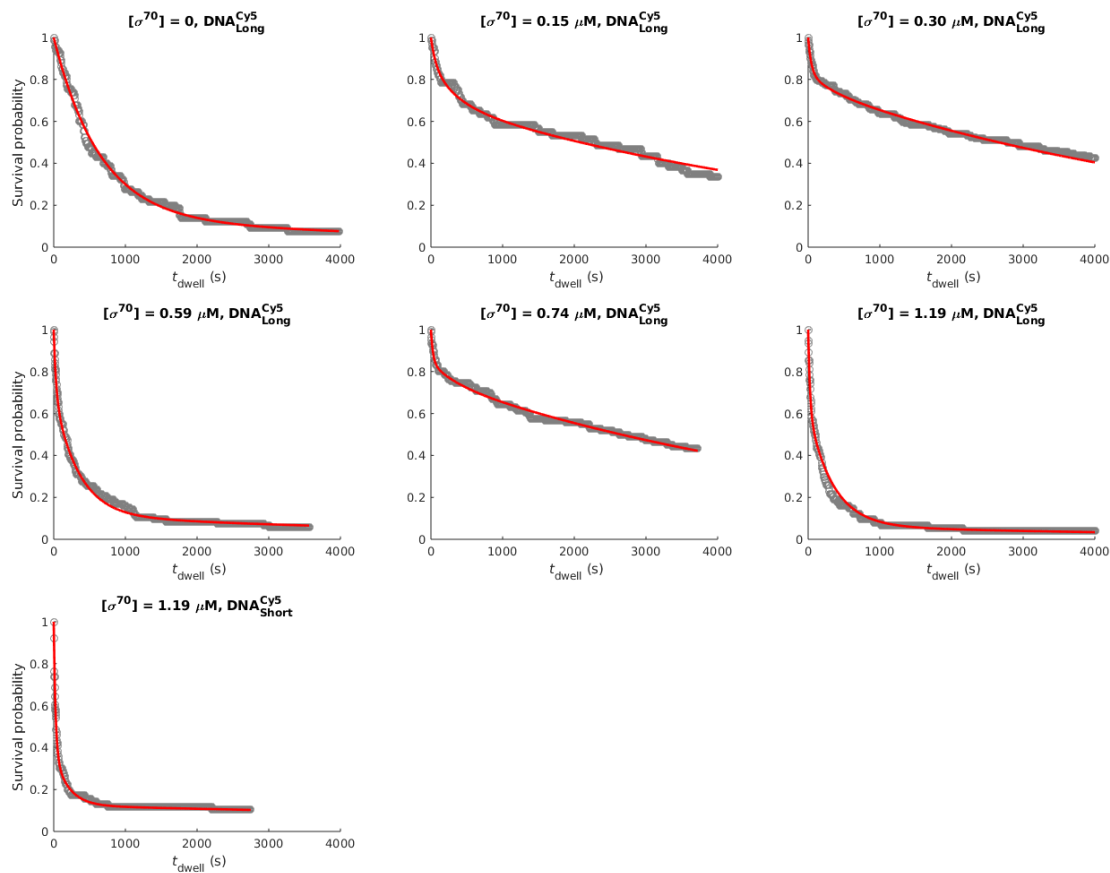

**Fig. S8. RNAP<sup>549</sup> — DNA dwell time distributions and global fits with two different DNA constructs in the presence of different concentrations of  $\sigma^{70}$ .** Displayed fits (red) are to the global model in which  $k_{\text{inter}}$  and  $k_{\text{slow}}$  are fixed across experiments, and  $k_{\text{fast}}$  is constrained to a hyperbolic dependence on  $\sigma^{70}$  concentration. This contrasts with Fig. S4 in which we used independent local parameter values for each dataset. Parameters for the fits shown here are summarized in Table 2 and Table S3. Experimental data (gray) are the same as in Fig. S4.

**Table S1. Fraction of DNA and non-DNA locations that had one RNAP<sup>549</sup> molecule bound at  $t = 0$ .**

| $[\sigma^{70}](\mu\text{M})$ | Fraction of locations |         |
|------------------------------|-----------------------|---------|
|                              | DNA                   | non-DNA |
| 0                            | 18%                   | 1.8%    |
| 0.15                         | 15%                   | 0.5%    |
| 0.30                         | 31%                   | 0.9%    |
| 0.59                         | 17%                   | 1.6%    |
| 0.74                         | 15%                   | 0.7%    |
| 1.19                         | 25%                   | 1.3%    |

The non-DNA binding was measured by observing the binding of RNAP<sup>549</sup> molecules at random positions in the microscope field of view that contained no visible DNA<sub>Long</sub><sup>Cy5</sup> molecules.

**Table S2. Fit parameters for distribution of Cy5- $\sigma^{70}$  RNAP<sup>549</sup> dwell times on DNA<sub>Long</sub><sup>Cy5</sup>.**

| <b>Non-DNA</b>                                |                                 |                                                 |                                                 |                                              |                                              |
|-----------------------------------------------|---------------------------------|-------------------------------------------------|-------------------------------------------------|----------------------------------------------|----------------------------------------------|
| $F_{nD}$ ( $\times 10^{-5}$ s <sup>-1</sup> ) | $a_1^{nD}$ ( $\times 10^{-1}$ ) | $k_1^{nD}$ ( $\times 10^{-2}$ s <sup>-1</sup> ) | $k_2^{nD}$ ( $\times 10^{-4}$ s <sup>-1</sup> ) |                                              |                                              |
| 1.4                                           | 5.2 (4.2 – 6.1)                 | 6.0 (5.0 – 9.0)                                 | 2.0 (1.0 – 4.0)                                 |                                              |                                              |
| <b>DNA</b>                                    |                                 |                                                 |                                                 |                                              |                                              |
| $F_D$ ( $\times 10^{-5}$ s <sup>-1</sup> )    | $a_1^D$ ( $\times 10^{-1}$ )    | $k_1^D$ ( $\times 10^{-1}$ s <sup>-1</sup> )    | $a_2^D$ ( $\times 10^{-1}$ )                    | $k_2^D$ ( $\times 10^{-3}$ s <sup>-1</sup> ) | $k_3^D$ ( $\times 10^{-5}$ s <sup>-1</sup> ) |
| 6.8                                           | 2.4(1.9 – 3.0)                  | 5.1 (3.8 – 6.4)                                 | 3.8(3.0 – 4.4)                                  | 3.6 (3.0 – 4.6)                              | 7.2 (0 – 14.7)                               |

Non-DNA data represents nonspecific binding of Cy5- $\sigma^{70}$  RNAP<sup>549</sup> to the surface of the glass flow chamber, and was taken into account in fitting the DNA data. The models used for the fits and their parameters are defined in Eqs. 16 and 18. Values are presented with their 68% C.I.s.

**Table S3. Fit parameters for survival lifetime probability distributions obtained by globally fixing  $k_{\text{inter}}$  and  $k_{\text{slow}}$  and considering  $k_{\text{fast}}$  dependence on  $[\sigma^{70}]$ .**

| $[\sigma^{70}]$ ( $\mu\text{M}$ ) | N   | $a_{\text{fast}} (\times 10^{-1})$ | $a_{\text{inter}} (\times 10^{-1})$ | $k_{\text{inter}} (\times 10^{-3} \text{ s}^{-1})$ | $k_{\text{slow}} (\times 10^{-4} \text{ s}^{-1})$ |
|-----------------------------------|-----|------------------------------------|-------------------------------------|----------------------------------------------------|---------------------------------------------------|
| 0                                 | 65  | 8.6(7.9 – 9.2)                     | -                                   | 2.9(2.5 – 3.5)                                     | 1.6(1.4 – 1.8)                                    |
| 0.15                              | 60  | 1.2(0.4 – 2.0)                     | 1.8(0.8 – 2.9)                      | "                                                  | "                                                 |
| 0.30                              | 139 | 1.7(1.3 – 2.1)                     | 0.7(0.1 – 1.2)                      | "                                                  | "                                                 |
| 0.59                              | 106 | 3.0(2.3 – 3.8)                     | 5.8(5.1 – 6.5)                      | "                                                  | "                                                 |
| 0.74                              | 106 | 1.6(1.1 – 2.0)                     | 0.8(0.3 – 1.4)                      | "                                                  | "                                                 |
| 1.19                              | 74  | 3.8(2.9 – 4.7)                     | 5.5(4.7 – 6.5)                      | "                                                  | "                                                 |
| 1.19*                             | 74  | 6.2(5.1 – 7.0)                     | 2.6(1.8 – 3.6)                      | 5.1(3.7 – 7.8)                                     | 0.7(0 – 1.3)                                      |

(\*) Experiment performed with a 586 bp long circular template made from a different DNA sequence (DNA<sub>Short</sub><sup>Cy5</sup>). N is the number of DNA sites with co-localized RNAP that were analyzed. The values are presented with 68% C.I.s

## 78 References

- 79 1. LJ Friedman, J Gelles, Multi-wavelength single-molecule fluorescence analysis of transcription mechanisms. *Methods (San*  
80 *Diego, Calif.)* **86**, 27 (2015).  
81 2. TT Harden, et al., Alternative transcription cycle for bacterial RNA polymerase. *Nature Communications* **11**, 448 (2020).  
82 3. P Melançon, MT Record, RR Burgess, Nitrocellulose Filter Binding Studies of the Interactions of Escherichia coli RNA  
83 Polymerase Holoenzyme with Deoxyribonucleic Acid Restriction Fragments: Evidence for Multiple Classes of Nonpromoter  
84 Interactions, Some of Which Display Promoter-like Proper. *Biochemistry* **21**, 4318–4331 (1982).  
85 4. AM Huerta, J Collado-Vides, Sigma70 promoters in Escherichia coli: specific transcription in dense regions of overlapping  
86 promoter-like signals. *Journal molecular biology* **333**, 261–278 (2003).  
87 5. M Kawano, G Storz, BS Rao, JL Rosner, RG Martin, Detection of low-level promoter activity within open reading frame  
88 sequences of Escherichia coli. *Nucleic Acids Research* **33**, 6268 (2005).
